# **Structure, dynamics and assembly of the ankyrin complex on human red blood cell membrane**

Xian Xia<sup>1,2,3</sup>, Shiheng Liu<sup>1,2,3</sup> and Z. Hong Zhou<sup>1,2,\*</sup>

<sup>1</sup> Department of Microbiology, Immunology, and Molecular Genetics, University of California, Los Angeles, CA 90095, USA

<sup>2</sup> California NanoSystems Institute, University of California, Los Angeles, CA 90095, USA

<sup>3</sup> These authors contributed equally

\*Corresponding author. Email: [Hong.Zhou@UCLA.edu](mailto:Hong.Zhou@UCLA.edu)

## 1 **Summary**

2 The cytoskeleton of red blood cell (RBC) is anchored to cell membrane by the ankyrin complex.  
3 This complex is assembled during RBC genesis and comprises primarily band 3, protein 4.2  
4 and ankyrin, whose mutations contribute to numerous human inherited diseases. High-  
5 resolution structures of the ankyrin complex have been long sought-after to understand its  
6 assembly and disease-causing mutations. Here, we analyzed native complexes on human RBC  
7 membrane by stepwise fractionation. Cryo-electron microscopy structures of nine band 3-  
8 associated complexes reveal that protein 4.2 stabilizes the cytoplasmic domain of band 3 dimer.  
9 In turn, the superhelix-shaped ankyrin binds to this protein 4.2 via ankyrin repeats (ARs) 6-13  
10 and to another band 3 dimer via ARs 17-20, bridging two band 3 dimers in the ankyrin complex.  
11 Integration of these structures with both prior and our biochemical data supports a model of  
12 ankyrin complex assembly during erythropoiesis and identifies interactions essential for  
13 mechanical stability of RBC.

## 14 **Main**

15 The human red blood cell (RBC, or the erythrocyte) is the most abundant cell in our blood and  
16 the principal gas exchanger between O<sub>2</sub> and CO<sub>2</sub> in our bodies. Devoid of nucleus, RBC has  
17 been engineered for a wide range of medical applications<sup>1</sup>. RBC exhibits unusual biconcave  
18 disc shape and remarkable membrane mechanical stability, both of which are essential for  
19 cycling through the vasculature for O<sub>2</sub>-CO<sub>2</sub> exchange. These properties are endowed by the  
20 RBC cytoskeleton, which is bridged to the RBC membrane by junctional complex and ankyrin  
21 complex<sup>2</sup>. The ankyrin complex, which primarily contains band 3, protein 4.2, ankyrin and Rh  
22 subcomplex, connects the cytoskeleton to the membrane through the cytoplasmic domain of  
23 band 3 (refs.<sup>3,4</sup>). Defects in these cytoskeleton and cytoskeleton-associated proteins are  
24 associated with numerous human hereditary diseases, such as hereditary spherocytosis, South  
25 Asian ovalocytosis and hereditary stomatocytosis<sup>5,6</sup>.

26 Mass spectrometry and biochemical analyses of complexes from detergent-treated RBC  
27 membranes have shown that band 3, protein 4.2 and ankyrin interact with one another<sup>7,8</sup>, and  
28 that ankyrin repeats (ARs) 13-24 of ankyrin bind to the cytoplasmic domain of band 3 (refs.<sup>9-11</sup>).  
29 Protein 4.2 is a peripheral membrane protein with N terminal myristoylation<sup>12</sup> and shares  
30 significant homology to transglutaminases but lacks transglutaminase activity<sup>13,14</sup>. Crystal  
31 structures are available separately for the membrane domain and cytoplasmic domain of band 3  
32 (refs.<sup>15,16</sup>), as well as ARs 13 to 24 of ankyrin<sup>17</sup>. However, there are no structures available for  
33 any full-length proteins, let alone for any complexes containing them. Consequently, our  
34 understanding regarding the molecular interactions underlying the assembly and disease-  
35 causing mutations of the ankyrin complex remains extremely limited. In this study, we obtained  
36 native band 3, band 3-protein 4.2 complex and ankyrin complex centered on band 3, protein 4.2  
37 and ankyrin (Fig. 1a) by stepwise fractionation of the erythrocyte membrane. A total of nine  
38 near-atomic resolution structures with various subunits of band 3, protein 4.2 and ankyrin were  
39 determined by cryo-EM, unraveling details of their interactions for the first time. These  
40 structures, combined with both prior and our biochemical data and knowledge about disease-  
41 causing mutations, supports a model of ankyrin complex assembly during erythropoiesis and  
42 reveal the importance of these interactions in linking the cytoskeleton to the membrane in RBC.

## 43 **Results**

### 44 **Isolation of native band 3-associated complexes**

45 To obtain the structures of full-length band 3 and related protein complexes, we analyzed the  
46 native proteins from human erythrocyte membrane by stepwise fractionation (Extended Data  
47 Fig. 1). Detergent solubilization of the erythrocyte membrane gave rise to three fractions: low-  
48 salt fraction, high-salt fraction 1, and high-salt fraction 2. To stabilize the ankyrin complex in the  
49 high-salt fraction 2 for cryo-EM, GraFix (Gradient Fixation)<sup>18</sup> with glutaraldehyde was applied  
50 additionally.

51 SDS-PAGE and cryo-EM analyses both show that the predominant species in the low-  
52 salt fraction is band 3 (Extended Data Fig. 1b and 2c). The native band 3 is a dimer (Fig. 1b and  
53 Extended Data Fig. 2), and at an overall resolution of 4.8 Å, its structure reveals both the  
54 membrane domain (mdb3) and cytoplasmic domain (cdb3), each of which is similar to the  
55 crystal structures of mdb3 (ref.<sup>16</sup>) and cdb3 (ref.<sup>15</sup>), respectively. Though not resolved to high  
56 resolution, the cryo-EM density accommodates a cdb3 dimer structure with the characteristic  
57 reverse V-shape groove<sup>19</sup>, indicating that the structure of the band 3 dimer resolved here is in  
58 the *reversed-V* (*rev-V*) conformation (Extended Data Fig. 2g).

59 From the high-salt fraction 1, we identified 4 complexes—each containing a band 3  
60 dimer ( $B_2$ ) and differently associated/oriented [either *loosely* associated, or *tightly* in *vertical*  
61 ( $75^\circ$ ) or *diagonal* ( $45^\circ$ ) orientation to the membrane] protein 4.2 as either monomer ( $P_1$ ) or dimer  
62 ( $P_2$ )—designated as  $B_2P_1^{\text{loose}}$  (overall resolution 4.1 Å),  $B_2P_1^{\text{vertical}}$  (4.6 Å),  $B_2P_2^{\text{vertical}}$  (4.6 Å) and  
63  $B_2P_1^{\text{diagonal}}$  (3.6 Å) (Table 1, Extended Data Fig. 3 and Movie S1). All of them have identical  
64 interaction between the cdb3 and protein 4.2. The majority (56%) of the complexes were the  
65  $B_2P_1^{\text{diagonal}}$  complex (Fig. 1c and Extended Data Fig. 3c). Focused refinement further improved  
66 the resolution of the membrane (mdb3) and the cytoplasmic (cdb3 and protein 4.2) region to 3.3  
67 Å and 3.1 Å, respectively (Extended Data Fig. 3c). Although loosely associated to band 3 based  
68 on its less robust density, protein 4.2 in  $B_2P_1^{\text{loose}}$  is oriented the same as it is in  $B_2P_1^{\text{vertical}}$ . In the  
69 structure of  $B_2P_2^{\text{vertical}}$ , the two protein 4.2 subunits do not interact with each other; rather, each  
70 subunit independently binds to a cdb3 of the band 3 dimer with two-fold symmetry.

71 Two ankyrin-bound complexes were obtained from the high-salt fraction 2, both  
72 containing  $B_2P_1^{\text{diagonal}}$  but with either one or two ankyrin molecules, which we designate as  
73  $B_2P_1A_1$  (4.4 Å) or  $B_2P_1A_2$  (5.7 Å), respectively (Fig. 1d, Table 1 and Extended Data Fig. 4).  
74 Reprocessing the same particles extracted with a larger box size enabled visualization of  
75 ankyrin assembled on two dimers of band 3 ( $B_4$ ), which we designate as  $B_4P_1A_1$  and  $(B_2P_1A_1)_2$   
76 (Extended Data Fig. 4c).

77 In total, we isolated nine native band 3-associated complexes. Interactions among  
78 subunits of the band 3-associated complexes and related mutations, including those that cause  
79 human diseases, are detailed below.

### 80 **Structure of the full-length band 3**

81 Previous efforts to obtain a full-length band 3 structure have not been fruitful. We found that, in  
82 the absence of protein 4.2, native full-length band 3 existed as a dimer in the low-salt fraction,  
83 and only the membrane domains were well resolved (Fig. 1b). This low-resolution nature of  
84 cdb3 is consistent with the previous observations that the CM-linker that bridge the cytoplasmic  
85 and the anchored membrane domains is flexible<sup>19-21</sup>. Among the nine band 3-associated  
86 complexes mentioned above, B<sub>2</sub>P<sub>1</sub><sup>diagonal</sup> has the highest resolution, resolving both mdb3 and  
87 cdb3 domains, as well as their linker, suggesting that binding of protein 4.2 restricts the relative  
88 movement of mdb3 and cdb3. Since B<sub>2</sub>P<sub>1</sub><sup>diagonal</sup> has the best resolution, subsequent description  
89 of band 3 structure will be based on this complex unless otherwise stated.

90 This first atomic structure of the native, full-length band 3 reveals long sought-after  
91 structural features. Compared to the domain crystal structures of mdb3 (ref.<sup>16</sup>) and cdb3 (ref.<sup>15</sup>),  
92 our native band 3 structure (Fig. 1c, Extended Data Fig. 5a and 6) is not only full-length, but  
93 also contains previously unresolved regions: N-terminal loop (*a.a.* 30-55), CM-linker (*a.a.* 350-  
94 369), residues 641-648 with the N-glycan site N642, a long external loop (*a.a.* 554-566), and the  
95 mdb3-bound lipids. The dimer interface of mdb3 is similar to that in the crystal structure. But in  
96 the dimer interface of the cryo-EM maps, we resolved densities of several lipids or detergent  
97 molecules, which may facilitate the dimerization of band 3. There are no obvious interactions  
98 between the cdb3 and mdb3. Band 3 is a Cl<sup>-</sup>/HCO<sub>3</sub><sup>-</sup> exchanger and belongs to the SLC4  
99 family<sup>22</sup>. In all our cryo-EM structures, mdb3 adopts an outward-facing conformation as that of  
100 the mdb3 crystal structure locked by the inhibitor H<sub>2</sub>DIDS<sup>16</sup> with a root mean square deviation  
101 (RMSD) of 0.931 Å for 443 of its 475 C<sub>α</sub> atoms (Extended Data Fig. 5a,b). The N-terminal ends

102 of the two transmembrane helices (TM3 and TM10) face each other and create a positive  
103 dipole, which may provide the binding site for substrate anions (Extended Data Fig. 5d,e).  
104 Remarkably, near residues R730 and E681 in the helical dipole, densities for four putative water  
105 molecules were observed, three of which possibly delineate the substrate binding site, as also  
106 predicted from the structure of substrate-bound SLC4 (NDCBE<sup>23</sup>), SLC23 (UraA<sup>24</sup>) and SLC26  
107 (BicA<sup>25</sup>) family transporters (Extended Data Fig. 5d,e). Consistent with this assignment,  
108 mutation of the residue R748 or E699 in murine band 3 (equivalent to R730 and E681 in human  
109 band 3, respectively) resulted in loss of Cl<sup>-</sup>/HCO<sub>3</sub><sup>-</sup> exchange<sup>26-28</sup>, highlighting the importance of  
110 these residues in anion transport activity. Intriguingly, one molecule of n-Dodecyl-β-D-Maltoside  
111 (DDM) was identified at the interface between the gate and core domain of mdb3 (Extended  
112 Data Fig. 5c). Unlike H<sub>2</sub>DIDS, the DDM molecule does not block the substrate binding site.  
113 Instead, it may lock the relative rocking movement between the gate and core that is  
114 responsible for Cl<sup>-</sup>/HCO<sub>3</sub><sup>-</sup> translocation, leading to the observed outward-facing conformation.

### 115 **Protein 4.2 and its interactions with band 3**

116 Efforts to determine the structure of protein 4.2 have hitherto been hindered by difficulties in  
117 obtaining purified protein 4.2 in soluble form. The atomic model of protein 4.2 built from our  
118 cryo-EM structure of the B<sub>2</sub>P<sub>1</sub><sup>diagonal</sup> complex contains 663 of its 691 residues. It has a triangular  
119 shape, with the body of the triangle formed by the core domain and the three vertices each  
120 formed by a domain with an immunoglobulin (Ig)-like fold<sup>29</sup> (Fig. 2A and Extended Data Fig. 7a-  
121 e). These domains are sequential in sequence, and their folds and architecture are both similar  
122 to those of the transglutaminase family of enzymes in the closed conformation<sup>13,30-32</sup> (RMSD of  
123 3.898 Å with PDB 1L9N across 651 Cα atom pairs) (Fig. 2b). Therefore, we will use the  
124 transglutaminase domain names to describe corresponding domains of protein 4.2, *i.e.*, β-  
125 sandwich (*a.a.* 7-137, h-type Ig-like fold), core (*a.a.* 152-457), first (*a.a.* 475-586) and second  
126 (*a.a.* 590-685) β-barrel domains (s-type Ig-like fold), from N to C-terminus.

127           The core domain has a globular shape with 10 helices ( $\alpha$ 3-12) flanking the 10  $\beta$  strands  
128           ( $\beta$ 10-19) that form three  $\beta$ -sheets in the middle (Extended Data Fig. 7a). Notably, the catalytic  
129           triads, C272, H330 and D353, in transglutaminase are replaced by A268, Q327 and H350,  
130           respectively (Extended Data Fig. 7b and 8); the three corresponding residues are more  
131           separated from each other in protein 4.2 than in transglutaminase (Extended Data Fig. 7b). The  
132           biochemically identified ATP-binding loop (P-loop, *a.a.* 316-322)<sup>33</sup> in this domain is situated at  
133           its interface with  $\beta$ -barrel 1 (Fig. 2d), with a shift  $\sim$ 5 Å towards  $\beta$ -barrel 1 compared to the  
134           corresponding loop of transglutaminase (PDB: 1L9N)<sup>31</sup>. Intriguingly, a Ca<sup>2+</sup> binding site in  
135           transglutaminase (PDB: 1L9N)<sup>31</sup> corresponds to the N-terminus of helix  $\alpha$ 12 and the loop  
136           around  $\beta$ 17 in the protein 4.2 core structure, both of which are closer to the  $\beta$ -barrel 1 domain  
137           than in transglutaminase (Fig. 2d). While no ATP and calcium were observed in our structure,  
138           these shifts suggest that ATP binding/hydrolysis or calcium binding may induce conformational  
139           changes to protein 4.2 (ref.<sup>30</sup>), possibly modulating interactions with ankyrin (see below).

140           The three Ig-like domains share typical  $\beta$ -strand topology, but the N-terminal proximal  
141           one ( $\beta$ -sandwich) contains one additional strand (d) and two short helices (Extended Data Fig.  
142           7c-e). Upon binding of cdb3,  $\beta$ -barrel 2 and the region near  $\alpha$ 7 (*a.a.* 227-268) shift towards band  
143           3 (Fig. 2c). The membrane-proximal region of protein 4.2 is connected to the density of  
144           detergent micelles and contains predominantly positively charged residues (Extended Data Fig.  
145           7f). These structural observations are consistent with previous observations that protein 4.2 is  
146           myristoylated at the N-terminal Glycine residue and anchored to the lipid bilayer<sup>12,34</sup>.

147           Among the eight protein 4.2-containing structures, the interactions between band 3 and  
148           protein 4.2 are nearly identical. On band 3, this interaction is essentially through its cytoplasmic  
149           domain. The N-terminal loop (*a.a.* 30-55) was disordered in the absence of protein 4.2 and  
150           became ordered and visible upon binding protein 4.2 (Fig. 2e). The binding interface between  
151           band 3 and protein 4.2 can be divided into three regions (Fig. 2f). In region 1, a short helix and

152 nearby loops of band 3 are docked into the groove formed by the core and the  $\beta$ -sandwich  
153 domains of protein 4.2 (Fig. 2g). The interactions include hydrogen bonds (band 3-protein 4.2:  
154 T42-E634, T49-D187) and electrostatic interaction between band 3 D45 and protein 4.2 R261,  
155 as well as hydrophobic interaction requiring band 3 Y46. In region 2, the band 3 loop (a.a. 30-  
156 39) lies on the surface of  $\beta$ -barrel 2 of protein 4.2. This interaction is mostly mediated by  
157 electrostatic interactions and hydrogen bonds (band 3-Protein 4.2: E32-R640, E33-K651, A35-  
158 R638, H37-S636), while the hydrophobic interaction involving P34 of band 3 also strengthens  
159 the interaction (Fig. 2h). In region 3, residues around  $\alpha$ 3 (a.a. 120-150) and the loop after  $\beta$ 7  
160 (a.a. 249-250) in cdb3 hydrogen-bond with protein 4.2's  $\beta$ -barrel 2 domain and the  $\beta$ -sandwich  
161 domain, respectively (Fig. 2i). Besides the major interface described above, the CM-linker of  
162 band 3 interacts with the core domain of protein 4.2, further stabilizing the  $B_2P_1^{\text{diagonal}}$  complex  
163 (Extended Data Fig. 9f-h), which is not observed in the  $B_2P_1^{\text{vertical}}$  and  $B_2P_2^{\text{vertical}}$  complexes.  
164 Notably, protein 4.2 does not interact with mdb3 specifically; rather, the mdb3 proximal N  
165 terminus of protein 4.2 can restrict the rocking movement between the gate and core domains of  
166 mdb3 needed for ion exchange/transport. Such restriction might be the reason why band 3's  
167 capability of ion transport decreases after binding protein 4.2 (ref.<sup>35</sup>). These close interactions  
168 between band 3 and protein 4.2 are consistent with both biochemical observations and disease-  
169 causing mutations. Protein 4.2 can be purified from the membrane only by relatively harsh  
170 treatments<sup>36,37</sup>. Two hereditary spherocytosis mutations (E40K and G130R)<sup>38,39</sup> in cdb3, which  
171 lead to disproportionate loss of protein 4.2, are located on these binding interfaces (Fig. 2g,i),  
172 further highlighting the essential role of band 3-protein 4.2 interaction in the function of  
173 erythrocytes.

#### 174 **Anchorage of ankyrin to protein 4.2 and band 3**

175 Previous crystal structures of recombinantly-expressed ankyrin fragments indicated that the 89  
176 kDa N-terminal membrane binding domain of erythrocyte ankyrin consists of 24 ankyrin repeats



177 of approximately 33 amino acids each<sup>17,40</sup>. ARs 6-24 were modeled in our cryo-EM density  
178 maps of the four ankyrin-containing complexes [B<sub>2</sub>P<sub>1</sub>A<sub>1</sub>, B<sub>2</sub>P<sub>1</sub>A<sub>2</sub>, B<sub>4</sub>P<sub>1</sub>A<sub>1</sub> and (B<sub>2</sub>P<sub>1</sub>A<sub>1</sub>)<sub>2</sub>] (Fig. 3a  
179 and Extended Data Fig. 10a,b,e). No significant global structural changes occur in either band 3  
180 or protein 4.2 in these complexes upon ankyrin binding.

181 The interactions between ankyrin and protein 4.2 are the same in all four ankyrin-  
182 containing complexes; therefore, we focused our description below on B<sub>2</sub>P<sub>1</sub>A<sub>1</sub>, which has the  
183 best resolution (4.1 Å) for the region involving ankyrin-protein 4.2 interactions. Protein 4.2  
184 interacts extensively with ARs 6-13 of ankyrin via a conserved surface on its core and β-barrel 1  
185 domains (Fig. 3b, Extended Data Fig. 7h and 8). Overall, these two domains clamp ankyrin, with  
186 major binding sites located in the core domain of protein 4.2. Specifically, residues around α3  
187 (*a.a.* R143-E152) of protein 4.2 interact with ARs 6-8 of ankyrin via hydrogen bonds, whereas  
188 residues between β17 and α12 (*a.a.* Y413-E439) contact extensively with ARs 9-12 through  
189 both hydrogen bonds and hydrophobic interactions (hydrophobic stacking between Y413 of  
190 protein 4.2 and R385, H351 of ankyrin) (Fig. 3c,d and Extended Data Fig. 8). This ankyrin-  
191 protein 4.2 binding is further strengthened by contacts between the β-barrel 1 of protein 4.2  
192 (residues Y476-L478 and H500) and AR-13 of ankyrin (Fig. 3b). The previously identified hairpin  
193 of protein 4.2 (N163-D180) in the core domain<sup>13,41</sup> has no interaction with band 3, but instead is  
194 close to AR-11 of ankyrin and thus may facilitate the association between protein 4.2 and  
195 ankyrin (Fig. 3d).

196 Besides interacting with protein 4.2, ankyrin also directly contacts band 3 in three  
197 [B<sub>2</sub>P<sub>1</sub>A<sub>2</sub>, B<sub>4</sub>P<sub>1</sub>A<sub>1</sub> and (B<sub>2</sub>P<sub>1</sub>A<sub>1</sub>)<sub>2</sub>] of the four ankyrin-containing complexes (Fig. 4a and Extended  
198 Data Fig. 10a,b,e), specifically with ARs 17-20 binding cdb3. The details of this binding are  
199 illustrated with B<sub>2</sub>P<sub>1</sub>A<sub>2</sub> (4.6 Å after focus classification) (Fig. 4b), including the following three  
200 sets of amino acids between ankyrin and band 3: AR-17 (L556-Q563) and AR-18 (*a.a.* R590-  
201 H596) with band 3 residues near α3 (*a.a.* S127-G130) and β7 (*a.a.* E252-E257), AR-19 (*a.a.*

202 R619-S627) with band 3 residues E151-K160 near  $\alpha 4$ , and AR-20 (*a.a.* K657-L663) with band  
203 3's loop residues K69-E72 and D183.

204 Biochemical data further confirmed these observed interactions between band 3 and  
205 ankyrin. First, our pull-down assay showed that the mutations G130R (disease mutation) on  
206 band 3  $\alpha 3$  and R155A on band 3  $\alpha 4$  eliminated ankyrin binding. In addition, ankyrin truncations  
207 ARs 18-24, ARs 19-24 and ARs 20-24, as well as mutations on AR-19 (Q623A/Y624A),  
208 abolished band 3 interaction (Fig. 4c), further validating the atomic details of the band 3-ankyrin  
209 interaction. Earlier, site-directed mutagenesis and antibody studies indicated that residues 63-  
210 73 (ref.<sup>42</sup>), 118-162 (ref.<sup>9</sup>) and 175-185 (ref.<sup>42</sup>) in the peripheral region of cdb3 were responsible  
211 for ankyrin binding. Site-directed spin-labeling on ankyrin demonstrated that its convex surface,  
212 other than its concave groove of ARs 18-20, served as primary sites to contact cdb3 (ref.<sup>11</sup>),  
213 which is consistent with our structures.

214 As indicated above, the protein 4.2 binding sites on band 3 partially overlap with the  
215 ankyrin binding sites on band 3 (Extended Data Fig. 6), indicating that protein 4.2 and ankyrin  
216 associate with band 3 monomer exclusively. The interface between protein 4.2 and ankyrin  
217 spans about 1630 Å<sup>2</sup>, which is ~2.4 fold larger than the interface of band 3-ankyrin (about 690  
218 Å<sup>2</sup>). Combined with the described interactions between protein 4.2 and band 3 in the previous  
219 section, it can be inferred that protein 4.2 may function as a linker to strengthen the ankyrin-  
220 band 3 association, consistent with previous findings that protein 4.2 deficiency weakened  
221 ankyrin-band 3 association on the erythrocyte membrane<sup>30,43,44</sup>.

## 222 Discussion

223 Prior biochemical analysis of band 3 multiprotein complex assembly during erythropoiesis  
224 established the temporal progression towards the assembly of the ankyrin complex from various  
225 sub-complexes, including band 3, band 3-protein 4.2 complex and Rh complex<sup>44-46</sup>. The ratio of  
226 abundance of band 3, protein 4.2, ankyrin in RBC is about 10:2:1 (ref.<sup>47</sup>), which differs from the

227 stoichiometry ratio (4:1:1) of these proteins in the ankyrin complex. Therefore, as the most  
228 abundant protein on the mature RBC membrane<sup>48</sup>, band 3 could exist as a dimer without  
229 forming larger complexes with others in the mature RBC; and likewise, other sub-complexes  
230 could exist without forming the ultimate supra-complex with all components. Indeed, their  
231 existence on mature RBC is the basis for our ability to use the stepwise fractionation strategy to  
232 capture a total of nine native structures from the RBC membrane reported above though we  
233 could not rule out the possibility that some may have resulted from disassembly during isolation.  
234 These results now allow us to populate the previously depicted model of ankyrin complex  
235 assembly (Fig. 5; Movie S1) during erythropoiesis with experimentally observed sub-complex  
236 structures.

237 Assembly of ankyrin complex possibly starts from free band 3 dimer<sup>46</sup>. By interacting  
238 with the *rev-V* shaped band 3, protein 4.2 is incorporated to form the band 3-protein 4.2  
239 complex, first in a loosely-bound vertical conformation ( $B_2P_1^{\text{loose}}$ , Fig. 5 step 1) and then  
240 converted into a tightly-bound vertical conformation ( $B_2P_1^{\text{vertical}}$ ) (Fig. 5 step 2 and Extended  
241 Data Fig. 3c). A second protein 4.2 molecule can further interact with the unoccupied cdb3,  
242 forming a C2-symmetric  $B_2P_2^{\text{vertical}}$  complex (Fig. 5 step 2a). Next, the membrane anchorage site  
243 of protein 4.2 moves from the edge to the center of the mdb3 dimer while cdb3 shifts off the 2-  
244 fold axis (Extended Data Fig. 9a-e), transitioning from  $B_2P_1^{\text{vertical}}$  into  $B_2P_1^{\text{diagonal}}$  (Fig. 5 step 3).  
245 Protein 4.2 interacts with the CM-linker of band 3 in  $B_2P_1^{\text{diagonal}}$ , further stabilizing the diagonal  
246 conformation of protein 4.2 in the band 3-protein 4.2 complex (Extended Data Fig. 9f-h).  
247 Following the formation of  $B_2P_1^{\text{diagonal}}$ , one ankyrin molecule binds to protein 4.2, resulting in the  
248  $B_2P_1A_1$  complex (Fig. 5 step 4). By simultaneously interacting with protein 4.2 at ARs 6-13 and  
249 band 3 at ARs 17-20, ankyrin can bridge two band 3 dimers to form a  $B_4P_1A_1$  complex (Fig. 5  
250 step 5), consistent with our results from gel-filtration analysis of the reconstituted ankyrin  
251 complex (Extended Data Fig. 10b) and the observation that binding of ankyrin to band 3  
252 promoted the formation of band 3 tetramers<sup>49,50</sup>. To align mdb3 of both band 3 dimers to the cell

253 membrane, the second band 3 dimer must be in the V shape conformation and without protein  
254 4.2 binding (Fig. 5 step 5).

255 Notably absent from the above assembly picture are several other complexes, likely due  
256 to their flexibility and/or transient existence. For example, a second ankyrin molecule can bind to  
257 cdb3 not occupied by protein 4.2, forming a B<sub>2</sub>P<sub>1</sub>A<sub>2</sub> complex (Extended Data Fig. 10c), which  
258 constitutes a small portion (14% of the particles) of ankyrin-bound complexes. Analytic gel-  
259 filtration analysis of the reconstituted ankyrin complex shows that the second ankyrin (Extended  
260 Data Fig. 10d) can be incorporated into the ankyrin complex. Furthermore, through the  
261 interaction between the ZU5-UPA domain of ankyrin and repeats 13-14 of  $\beta$ -spectrin<sup>51</sup>, the  
262 ankyrin complex links the spectrin network to the erythrocyte membrane (Fig. 5, step 6). Other  
263 complexes, such as the Rh complex, which contains RhCE, RhD, RhAG, CD47, LW and  
264 glycophorin B, can also interact with band 3, protein 4.2 and ankyrin<sup>4,52</sup>, forming the intact  
265 ankyrin complex. While association of protein 4.2 and ankyrin to band 3 may occur at early  
266 stage of erythropoiesis even prior to membrane integration, incorporation of the Rh complex is  
267 thought to happen afterwards on the cell membrane<sup>45,46</sup>. The validity of our proposed model of  
268 ankyrin complex assembly (Fig. 5) and other possible assembly intermediates during  
269 erythropoiesis await testing by cryo electron tomography of erythropoiesis at different stages.

270 The significance of the current study lies in both biology and technology perspectives.  
271 From the biology perspective, mutations on the components of the ankyrin complex can result in  
272 disorders in erythrocytes (hereditary spherocytosis, South Asian ovalocytosis, and hereditary  
273 stomatocytosis<sup>5,6</sup>) (Extended Data Fig. 10f). In hereditary spherocytosis, disruption of subunit  
274 interactions in the ankyrin complex results in loss of connection between the cytoskeleton and  
275 the membrane, consequently decreasing mechanical resistance and shortening the lifespan of  
276 the erythrocyte. Disease mutations, including G130R, E40K of band 3 and D145Y of protein 4.2,  
277 are located at the subunit binding interfaces. The availability of atomic structures of the ankyrin  
278 complex provides mechanistic insight to red blood cell functions and paves the way for developing

279 therapeutics against these diseases. From a technical perspective, the current work  
280 demonstrates an approach for direct visualization, at near-atomic resolution, of native protein  
281 complexes as they exist on membranes or in the cellular milieu. As such, notwithstanding  
282 obvious challenges in dealing with species only existing transiently in cells, this approach opens  
283 the door for structural study of native macromolecular complexes to capture their multiple  
284 conformational states (*e.g.*, changes in binding partners<sup>53</sup> or cycling through sub-complexes like  
285 the spliceosome<sup>54,55</sup>) and during various functional stages (*e.g.*, genesis of RBC in health and  
286 progression of pathology in diseases<sup>56</sup>).

287 **Methods**

288 **Protein purification**

289 To dislodge different band 3-associated complexes from the human red blood cell membrane-  
290 cytoskeleton network, ghost membrane was sequentially treated with low-salt and high-salt  
291 buffers as reported before<sup>8,57</sup> (Extended Data Fig. 1a). 50 mL packed human red blood cells  
292 (BioIVT) at 4°C were washed with five volumes of phosphate-buffered saline (PBS) at 2,000g  
293 for 10 min. All the following steps were performed at 4°C unless otherwise specified. The cells  
294 were then lysed in 10 volumes of hypotonic buffer containing 7.5 mM sodium phosphate at pH  
295 7.5, 1 mM EDTA and protease inhibitors [0.5 mM phenylmethylsulphonyl fluoride (PMSF), 0.7  
296 µg/mL pepstatin A, 2.5 µg/mL aprotinin, 5 µg/mL leupeptin] for 30 min. The lysate was  
297 centrifuged for 30 min at 20,000g to pellet the ghost membrane. The ghost membrane was  
298 further washed in the hypotonic buffer and pelleted at 20,000g for 30 min four times, followed by  
299 extraction in a low-salt buffer containing 0.1 M KCl, 7.5 mM sodium phosphate at pH 7.5, 1 mM  
300 EDTA, 1 mM dithiothreitol (DTT), 1% n-Dodecyl-beta-Maltoside (DDM) and protease inhibitors  
301 for 1 h. Subsequently, the sample was centrifuged at 20,000g for 20 min, resulting in the  
302 supernatant (low-salt fraction) and the pellet. The pellet was further extracted with a high-salt  
303 buffer containing 1 M KCl, 7.5 mM sodium phosphate at pH 7.5, 1 mM EDTA, 1 mM DTT, 1%  
304 DDM and protease inhibitors for 1 h. After centrifugation at 45,000g for 30 min, the supernatant  
305 (high-salt fraction) was obtained for further purification.

306 The low-salt and high-salt fractions were further purified by using gel-filtration column  
307 Superose 6 Increase 10/300 GL (GE Healthcare). The low-salt fraction was injected into the  
308 column in SEC150 buffer (10 mM Tris 7.5, 150 mM NaCl, 1 mM DTT, 0.015% DDM and  
309 protease inhibitors). After analysis by SDS-PAGE, band 3 fractions were pooled and purified by  
310 using the same column for a second time (Extended Data Fig. 1b). The peak fraction was  
311 concentrated and used for cryo-EM grid preparation. The high-salt fraction was injected into the

312 gel-filtration column in SEC500 buffer (10 mM Tris 7.5, 500 mM NaCl, 1 mM DTT, 0.015% DDM  
313 and protease inhibitor), and resulted in an elution volume of 14.5 mL of high-salt fraction 1  
314 (band 3-protein 4.2 complex) and 12.5 mL of high-salt fraction 2 (ankyrin complex) (Extended  
315 Data Fig. 1c). Band 3-protein 4.2 complex was pooled and further purified by using the same  
316 column for a second time in SEC300 buffer (10 mM Tris 7.5, 300 mM NaCl, 1 mM DTT, 0.015%  
317 DDM and protease inhibitor) (Extended Data Fig. 1d). The good fractions were combined and  
318 concentrated for cryo-EM. For band 3-protein 4.2 complex used in analytical gel filtration,  
319 pooled fractions from the first gel-filtration purification were further purified by anion exchange  
320 column (Source-15Q, GE Healthcare) and then subjected to a second gel-filtration column in  
321 SEC150 buffer. The ankyrin complex was stabilized by a Grafix<sup>18,58</sup> method after the first gel-  
322 filtration purification of the high-salt fraction. Glycerol gradient was made by mixing 6 mL light  
323 buffer (20 mM HEPES 7.5, 300 mM NaCl, 0.015% DDM, 10% glycerol) and 6 mL heavy buffer  
324 [20 mM HEPES 7.5, 300 mM NaCl, 0.015% DDM, 30% glycerol, 0.2% glutaraldehyde  
325 (Polysciences)] in a gradient master (BioComp). Ankyrin complex was concentrated to 200  $\mu$ L  
326 and dialyzed to buffer containing 20 mM HEPES 7.5, 300 mM NaCl, 0.015% DDM. The sample  
327 was loaded on top of the glycerol gradient and centrifuged at 4°C for 18 h at a speed of 35,000  
328 rpm in SW-41Ti rotor (Beckman). Fractions of 500  $\mu$ L were collected, and the cross-link reaction  
329 was quenched by adding Tris 7.5 to a final concentration of 50 mM. Good fractions after  
330 negative stain screening were combined and subjected to the gel-filtration column in SEC300  
331 buffer (Extended Data Fig. 1e). Finally, the fractions in the 12.5 mL peak were collected and  
332 used for cryo-EM.

333 All recombinant proteins and mutants were overexpressed in *E. coli* strain BL21(DE3).  
334 DNA sequences encoding ankyrin ARs 1-24 (*a.a.* 1-827), ARs 13-24 (*a.a.* 402-827), ARs 16-24  
335 (*a.a.* 494-827), ARs 17-24 (*a.a.* 527-827), ARs 18-24 (*a.a.* 561-827), ARs 19-24 (*a.a.* 597-827),  
336 ARs 20-24 (*a.a.* 630-827) and band 3 cytoplasmic domain (*a.a.* 1-379) were cloned into a  
337 modified pET-28a vector with an N-terminal hexahistidine tag followed by a SUMO tag. Mutants

338 were generated by QuikChange mutagenesis and confirmed by DNA sequencing. Proteins were  
339 expressed in *E. coli* and induced with 0.5 mM isopropyl- $\beta$ -D-thiogalactoside (IPTG, Sigma) at an  
340 OD<sub>600</sub> of 0.8. The culture was incubated at 25°C overnight. Cells were harvested by  
341 centrifugation and resuspended in a buffer containing 20 mM Tris 7.5, 300 mM NaCl, 1 mM  
342 PMSF and 1 mM benzamidine. The suspensions were lysed by using a cell disruptor (Avestin).  
343 After high-speed centrifugation at 30,000g for 1 h, the supernatant was loaded to a column with  
344 HisPur cobalt resin (Thermo Fisher). After a wash step, proteins were eluted with a buffer  
345 containing 20 mM Tris 7.5, 150 mM NaCl, 1 mM benzamidine and 250 mM imidazole. For band  
346 3 cytoplasmic domain, the His<sub>6</sub>-SUMO tag was removed by ULP1 (a SUMO protease). For all  
347 the ankyrin constructs, the His<sub>6</sub>-SUMO tag was retained. Proteins were further purified by ion-  
348 exchange column (Source-15Q, GE healthcare) and polished by gel-filtration column  
349 (Superdex-200, GE Healthcare) in SEC150 buffer without protease inhibitors. The purified  
350 proteins were concentrated and stored at -80°C.

### 351 **Cryo-EM sample preparation and image acquisition**

352 For cryo-EM sample optimization, an aliquot of 3  $\mu$ L of sample was applied onto a glow-  
353 discharged holey carbon-coated copper grid (300 mesh, QUANTIFOIL® R 2/1) or holey gold  
354 grid (300 mesh, UltrAuFoil® R 1.2/1.3). The grid was blotted with Grade 595 filter paper (Ted  
355 Pella) and flash-frozen in liquid ethane with an FEI Mark IV Vitrobot. An FEI TF20 cryo-EM  
356 instrument was used to screen grids. Cryo-EM grids with optimal particle distribution and ice  
357 thickness were obtained by varying the gas source (air using PELCO easiGlow™, target  
358 vacuum of 0.37 mbar, target current of 15 mA; or H<sub>2</sub>/O<sub>2</sub> using Gatan Model 950 advanced  
359 plasma system, target vacuum of 70 mTorr, target power of 50 W) and time for glow discharge,  
360 the volume of applied samples, chamber temperature and humidity, blotting time and force, and  
361 drain time after blotting. Our best grids for low salt fraction were obtained with holey carbon-  
362 coated copper grids, 20 s glow discharge using H<sub>2</sub>/O<sub>2</sub> and with the Vitrobot sample chamber  
363 temperature set at 8°C, 100% humidity, 6 s blotting time, 3 blotting force, and 0 s drain time. The



364 best grids for high-salt fraction 1 and 2 were obtained with holey gold grids, 20 s glow discharge  
365 using H<sub>2</sub>/O<sub>2</sub> and with the Vitrobot sample chamber set at 8°C temperature, 100% humidity, 6 s  
366 blotting time, 3 blotting force, and 0 s drain time.

367 Optimized cryo-EM grids were loaded into an FEI Titan Krios electron microscope with a  
368 Gatan Imaging Filter (GIF) Quantum LS device and a post-GIF K2 or K3 Summit direct electron  
369 detector. The microscope was operated at 300 kV with the GIF energy-filtering slit width set at  
370 20 eV. Movies were acquired using SerialEM<sup>59</sup> by electron counting in super-resolution mode at  
371 a pixel size of 0.535 Å/pixel or 0.55 Å/pixel with a total dosage ~50 e<sup>-</sup>/Å<sup>2</sup>/movie. Image  
372 conditions are summarized in Table 1.

### 373 **Cryo-EM reconstruction**

374 Frames in each movie were aligned for drift correction with the GPU-accelerated program  
375 MotionCor2 (ref.<sup>60</sup>). Two averaged micrographs, one with dose weighting and the other without,  
376 were generated for each movie after drift correction. The averaged micrographs have a  
377 calibrated pixel size of 1.062 Å (low-salt fraction) or 1.1 Å (high-salt fraction 1 and 2) at the  
378 specimen scale. The averaged micrographs without dose weighting were used only for defocus  
379 determination, and the averaged micrographs with dose weighting were used for all other steps  
380 of image processing. Workflows are summarized in Extended Data Fig. 2, 3 and 4 for low-salt  
381 fraction, high-salt fraction 1 and high-salt fraction 2, respectively.

382 For low-salt fraction (band 3), a total of 9,455 averaged micrographs were obtained, of  
383 which 1,000 micrographs were subjected to a quick analysis in cryoSPARC v3 (ref.<sup>61</sup>). The  
384 defocus values of the 9,455 averaged micrographs were determined by CTFFIND4 (ref.<sup>62</sup>).  
385 2,658,315 particles were automatically picked without reference using Gautomatch  
386 (<https://www2.mrc-lmb.cam.ac.uk/research/locally-developed-software/zhang-software/>).  
387 Several rounds of reference-free 2D classification were subsequently performed in  
388 RELION3.1<sup>63,64</sup> to remove “bad” particles (i.e., classes with fuzzy or un-interpretable features),

389 yielding 961,892 good particles. To retrieve more real particles from the micrographs, Topaz<sup>65</sup>, a  
390 convolutional neural network-based particle picking software, was trained by the final  
391 coordinates from cryoSPARC and used for the second round of particle picking. 2,953,637  
392 particles were obtained initially and resulted in 976,060 good particles after rounds of 2D  
393 classification in RELION. After the two sets of particles were combined and duplicates removed,  
394 a total of 1,286,729 particles were collected. A global search 3D classification in RELION was  
395 performed, with the map from cryoSPARC as the initial model. One good class containing  
396 530,179 particles was selected and subjected to a final step of 3D auto-refinement in RELION.  
397 Membrane part and cytoplasmic part of band 3 are refined together, without local refinement.  
398 The two half-maps from this auto-refinement step were subjected to RELION's standard post-  
399 processing procedure, yielding a final map with an average resolution of 4.8 Å.

400 For high-salt fraction 1 (band 3-protein 4.2 complex), a total of 20,842 averaged  
401 micrographs was obtained and subjected to particle picking in Gautomatch. 2,031,749 particles  
402 were selected after 2D and 3D classification in RELION. The coordinates of the selected  
403 particles were used for Topaz training in the second round of particle picking. 2,879,888  
404 particles were selected after the second round of particle sorting. The two sets of selected  
405 particles were combined and duplicates removed, resulting in 3,864,165 particles. These  
406 particles were subjected to a global search 3D classification with K=5, resulting in four different  
407 structures of band 3-protein 4.2 complex: 1,048,826 particles (27.1%) in the class of band 3 with  
408 a loosely bound protein 4.2 ( $B_2P_1^{\text{loose}}$ ), 406,951 particles (10.5%) in the class of band 3 with  
409 protein 4.2 binding vertically ( $B_2P_1^{\text{vertical}}$ ), 246,059 particles (6.4%) in the class of band 3 with two  
410 protein 4.2 binding vertically ( $B_2P_2^{\text{vertical}}$ ) and 2,162,329 particles (56%) in the major class of  
411 band 3 with protein 4.2 binding diagonally ( $B_2P_1^{\text{diagonal}}$ ). The  $B_2P_1^{\text{loose}}$  complex,  $B_2P_1^{\text{vertical}}$  complex  
412 and  $B_2P_2^{\text{vertical}}$  complex were further 3D classified with the skip-align option in RELION and  
413 reconstructed to 4.1 Å, 4.6 Å and 4.6 Å, respectively. For the  $B_2P_1^{\text{diagonal}}$  complex, the structure  
414 was classified and refined to 3.6 Å with an overall mask. When masks for the cytoplasmic part

415 and the membrane part were applied, the structures of the cytoplasmic part and the membrane  
416 part were reconstructed to 3.1 Å and 3.3 Å, respectively.

417 For high-salt fraction 2 (ankyrin complex), 21,187 good micrographs were obtained.  
418 Using a strategy similar to that of the band 3 dataset, a total of 4,048,034 unique particles were  
419 collected after two rounds of particle picking and 2D classification. The selected particles were  
420 subjected to 2D and 3D classification, and one good class containing 593,880 particles was  
421 selected. To further increase the number of good particles, a method of seed-facilitated 3D  
422 classification<sup>66</sup> was used. Briefly, all the raw particles from autopick were divided into six  
423 subsets and then mixed with the good particles (seed) from the previous step of 3D  
424 classification. Subsequently, after applying 3D classification separately, all the good classes  
425 were collected and combined, followed by 2D and 3D classification to generate a total of  
426 1,410,445 good particles. These particles were further 3D classified into four classes, resulting  
427 in two structures, with 383,995 particles in B<sub>2</sub>P<sub>1</sub>A<sub>1</sub> complex (one ankyrin molecule binds to one  
428 B<sub>2</sub>P<sub>1</sub><sup>diagonal</sup> complex via protein 4.2) and 63,084 particles in B<sub>2</sub>P<sub>1</sub>A<sub>2</sub> complex (two ankyrin  
429 molecules bind to one B<sub>2</sub>P<sub>1</sub><sup>diagonal</sup> complex via protein 4.2 and band 3, respectively). The two  
430 complexes were classified and refined in cryoSPARC using non-uniform refinement to  
431 resolutions of 4.4 Å and 5.7 Å for B<sub>2</sub>P<sub>1</sub>A<sub>1</sub> complex (160,406 particles) and B<sub>2</sub>P<sub>1</sub>A<sub>2</sub> complex  
432 (34,612 particles), respectively. A further step of focused refinement improved the core region's  
433 resolutions to 4.1 Å and 4.6 Å for B<sub>2</sub>P<sub>1</sub>A<sub>1</sub> complex and B<sub>2</sub>P<sub>1</sub>A<sub>2</sub> complex, respectively. When  
434 lowering the threshold of the maps, smeared density emerges at the edges of the box,  
435 indicating that the box size of 384 pixels is not big enough to include all the densities. Therefore,  
436 these particles were re-centered and extracted in a box size of 560 pixels. After 3D classification  
437 and refinement, two structures of ankyrin-containing complex were reconstructed to 5.6 Å and  
438 8.5 Å for B<sub>4</sub>P<sub>1</sub>A<sub>1</sub> complex and (B<sub>2</sub>P<sub>1</sub>A<sub>1</sub>)<sub>2</sub> complex, respectively.

439 **Resolution assessment**

440 All resolutions reported above are based on the “gold-standard” FSC 0.143 criterion<sup>67</sup>. FSC  
441 curves were calculated using soft spherical masks, and high-resolution noise substitution was  
442 used to correct for convolution effects of the masks on the FSC curves<sup>67</sup>. Prior to visualization,  
443 all maps were sharpened by applying a negative B factor, estimated using automated  
444 procedures<sup>67</sup>. Local resolution was estimated using ResMap<sup>68</sup>. The overall quality of the maps  
445 for band 3, band 3-protein 4.2 complexes, and ankyrin-containing complexes is presented in  
446 Extended Data Fig. 2d-f, 3d-h, and 4d-f, respectively. The reconstruction statistics are  
447 summarized in Table 1.

#### 448 **Atomic modeling, model refinement and graphics visualization**

449 Atomic model building started from the B<sub>2</sub>P<sub>1</sub><sup>diagonal</sup> complex map, which had the best resolution.  
450 We took advantage of the reported crystal structure of mdb3 (PDB: 4YZF)<sup>16</sup>, which was fitted  
451 into the focus-refined membrane domain map (3.3 Å) by UCSF Chimera<sup>69</sup>. We manually  
452 adjusted its side chain conformation and, when necessary, moved the main chains to match the  
453 density map using Coot<sup>70</sup>. This allowed us to identify extra densities for loop N554-P566, loop  
454 A641-W648 and N-acetylglucosamine (NAG) close to residue N642, as well as lipids at the  
455 dimer interface that were tentatively assigned as DDM or cholesterol accordingly. For the  
456 cytoplasmic part, the crystal structure of cdb3 (PDB: 1HYN)<sup>15</sup> was fitted into the focus-refined  
457 cytoplasmic domain map (3.2 Å) and manually adjusted. This enabled us to identify the extra  
458 densities for the N-terminus of the cdb3 (*a.a.* 30-55), absent in the crystal structure and  
459 interacting with protein 4.2 in our B<sub>2</sub>P<sub>1</sub><sup>diagonal</sup> complex. Next, we built the atomic model for protein  
460 4.2 *de novo*. Protein sequence assignment was mainly guided by visible densities of amino acid  
461 residues with bulky side chains, such as Trp, Tyr, Phe, and Arg. Other residues including Gly  
462 and Pro also helped the assignment process. Unique patterns of sequence segments containing  
463 such residues were utilized for validation of residue assignment. Finally, the models of the  
464 membrane part and the cytoplasmic part were docked into the 3.6 Å overall map in Chimera. As

465 the map resolution of the CM-linker between cdb3 and mdb3 is insufficient for *de novo* atomic  
466 modeling, we traced the main chain using Coot for *a.a.* 350-369.

467 For the structure of the band 3 dimer, models of cdb3 and mdb3 from the  $B_2P_1^{\text{diagonal}}$   
468 complex were fitted into the cryo-EM map in Chimera and manually adjusted using Coot. For  
469 the structures of  $B_2P_1^{\text{vertical}}$  and  $B_2P_2^{\text{vertical}}$ , models of mdb3, cdb3 and protein 4.2 from the  
470  $B_2P_1^{\text{diagonal}}$  complex were docked and manually adjusted.

471 For the structure of the  $B_2P_1A_1$  complex, we first docked the model of the  $B_2P_1^{\text{diagonal}}$   
472 complex into the cryo-EM map. Ankyrin repeats 6-20 (*aa.* 174-658) with side chains were built  
473 *de novo* using the focus map at 4.1 Å. ARs 21-24 were assigned with guidance from previous  
474 crystal structures of ankyrins (ARs 1-24 of AnkyrinB, PDB: 4RLV<sup>40</sup>; ARs 13-24 of AnkyrinR,  
475 PDB:1N11<sup>17</sup>) and truncated to C $\beta$  due to the lack of side-chain densities. Next, the structure of  
476  $B_2P_1A_1$  complex was fitted into the maps of  $B_2P_1A_2$ . This enabled us to identify extra densities  
477 for a second ankyrin which directly interacts with band 3. The bulky side chains of the second  
478 ankyrin were built using the focus map at 4.6 Å. The assignment of the band 3-associated  
479 ankyrin was further verified in both the  $B_4P_1A_1$  and  $(B_2P_1A_1)_2$  complexes.

480 The atomic models were refined using PHENIX<sup>71</sup> in real space with secondary structure  
481 and geometry restraints. All the models were also evaluated using the wwPDB validation server  
482 (Table 1). Representative densities are shown in Extended Data Fig. 2g, 3i and 4g-h.  
483 Visualization of the atomic models, including figures and movies, was accomplished in UCSF  
484 Chimera and Chimera X<sup>69</sup>.

### 485 **Structure-guided mutagenesis and pull-down assay**

486 The pull-down assay was performed with HisPur cobalt resin at 4°C in a binding buffer  
487 containing 10 mM Tris 7.5, 150 mM NaCl, 0.015% DDM. 20  $\mu$ L cobalt resin was used in a 200  
488  $\mu$ L binding reaction. Recombinant proteins were used in this assay. His<sub>6</sub>-SUMO tagged ankyrin  
489 at a final concentration of 4  $\mu$ M was pre-incubated with the resin and then mixed with 8  $\mu$ M of

490 band 3 cytoplasmic domain or mutant. After 60 min of incubation, the resin was washed four  
491 times with 1 mL of the binding buffer containing 10 mM imidazole and eluted with the binding  
492 buffer containing 250 mM imidazole. Samples were analyzed by SDS-PAGE and stained with  
493 InstantBlue (abcam). All experiments were repeated at least three times.

#### 494 **Analytical gel filtration**

495 Analytical gel filtration chromatography was carried out with the Superose 6 Increase 10/300 GL  
496 column at 4°C. The column was equilibrated with SEC150 buffer without protease inhibitors.  
497 Band 3-protein 4.2 complex was purified from the erythrocyte membrane. Ankyrin and band 3  
498 cytoplasmic domain were purified from *E. coli*. The His<sub>6</sub>-SUMO tag of ankyrin was retained. A  
499 protein sample of 500 µL was injected into the column and eluted at a flow rate of 0.5 mL/min.  
500 Fractions were then analyzed by SDS-PAGE.

#### 501 **Reporting summary**

502 Further information on research design is available in the Nature Research Reporting  
503 Summary linked to this article.

#### 504 **Data availability**

505 Cryo-EM density maps have been deposited in the Electron Microscopy Data Bank under  
506 accession numbers EMD-26148 (band 3 dimer), EMD-26145 (B<sub>2</sub>P<sub>1</sub><sup>loose</sup>), EMD-26146  
507 (B<sub>2</sub>P<sub>1</sub><sup>vertical</sup>), EMD-26147 (B<sub>2</sub>P<sub>2</sub><sup>vertical</sup>), EMD-26142 (B<sub>2</sub>P<sub>1</sub><sup>diagonal</sup>), EMD-26143 (membrane part of  
508 B<sub>2</sub>P<sub>1</sub><sup>diagonal</sup>), EMD-26144 (cytoplasmic part of B<sub>2</sub>P<sub>1</sub><sup>diagonal</sup>), EMD-26149 (B<sub>2</sub>P<sub>1</sub>A<sub>1</sub>), EMD-26150  
509 (cytoplasmic part of B<sub>2</sub>P<sub>1</sub>A<sub>1</sub>), EMD-26151 (B<sub>2</sub>P<sub>1</sub>A<sub>2</sub>), EMD-26152 (focused refinement of B<sub>2</sub>P<sub>1</sub>A<sub>2</sub>),  
510 EMD-26153 (B<sub>4</sub>P<sub>1</sub>A<sub>1</sub>) and EMD-26154 [(B<sub>2</sub>P<sub>1</sub>A<sub>1</sub>)<sub>2</sub>]. Model coordinates have been deposited in  
511 the Protein Data Bank under accession numbers 7TW2 (band 3 dimer), 7TW0 (B<sub>2</sub>P<sub>1</sub><sup>vertical</sup>),  
512 7TW1 (B<sub>2</sub>P<sub>2</sub><sup>vertical</sup>), 7TVZ (B<sub>2</sub>P<sub>1</sub><sup>diagonal</sup>), 7TW3 (B<sub>2</sub>P<sub>1</sub>A<sub>1</sub>), 7TW5 (B<sub>2</sub>P<sub>1</sub>A<sub>2</sub>) and 7TW6 (B<sub>4</sub>P<sub>1</sub>A<sub>1</sub>). All  
513 other data needed to evaluate the conclusions in the paper are present in the paper and/or the  
514 supplementary materials.

515 **Acknowledgments**

516 We thank Titania Nguyen, James Zhen and Alex Stevens for editorial assistance. This project is  
517 supported by grants from the US NIH (R01GM071940 to Z.H.Z.). We acknowledge the use of  
518 resources at the Electron Imaging Center for Nanomachines supported by UCLA and grants  
519 from the NIH (1S10OD018111 and 1U24GM116792) and the National Science Foundation  
520 (DBI-1338135 and DMR-1548924).

521 **Author contributions**

522 Z.H.Z. conceived the project. X.X. and S.L. prepared samples, acquired and analyzed cryo-EM  
523 data. X.X. engineered and isolated the recombinant proteins, and performed biochemistry  
524 analyses. S.L. and X.X. built the models. X.X., S.L. and Z.H.Z. interpreted the results and wrote  
525 the manuscript.

526 **Declaration of interests**

527 The authors declare no competing interests.

528

## References

- 529 1. Shi, J. et al. Engineered red blood cells as carriers for systemic delivery of a wide array of functional  
530 probes. *Proc Natl Acad Sci U S A* **111**, 10131-6 (2014).
- 531 2. Bennett, V. & Baines, A.J. Spectrin and ankyrin-based pathways: metazoan inventions for integrating cells  
532 into tissues. *Physiol Rev* **81**, 1353-92 (2001).
- 533 3. Bennett, V. & Stenbuck, P.J. The membrane attachment protein for spectrin is associated with band 3 in  
534 human erythrocyte membranes. *Nature* **280**, 468-73 (1979).
- 535 4. Mankelov, T.J., Satchwell, T.J. & Burton, N.M. Refined views of multi-protein complexes in the  
536 erythrocyte membrane. *Blood Cells Mol Dis* **49**, 1-10 (2012).
- 537 5. Narla, J. & Mohandas, N. Red cell membrane disorders. *Int J Lab Hematol* **39 Suppl 1**, 47-52 (2017).
- 538 6. Risinger, M. & Kalfa, T.A. Red cell membrane disorders: structure meets function. *Blood* **136**, 1250-1261  
539 (2020).
- 540 7. Korsgren, C. & Cohen, C.M. Associations of human erythrocyte band 4.2. Binding to ankyrin and to the  
541 cytoplasmic domain of band 3. *J Biol Chem* **263**, 10212-8 (1988).
- 542 8. Kumpornsinsin, K., Jiemsup, S., Yongkiettrakul, S. & Chookajorn, T. Characterization of band 3-ankyrin-  
543 Protein 4.2 complex by biochemical and mass spectrometry approaches. *Biochem Biophys Res Commun*  
544 **406**, 332-5 (2011).
- 545 9. Davis, L., Lux, S.E. & Bennett, V. Mapping the ankyrin-binding site of the human erythrocyte anion  
546 exchanger. *J Biol Chem* **264**, 9665-72 (1989).
- 547 10. Davis, L.H. & Bennett, V. Mapping the Binding-Sites of Human Erythrocyte Ankyrin for the Anion-  
548 Exchanger and Spectrin. *Journal of Biological Chemistry* **265**, 10589-10596 (1990).
- 549 11. Kim, S. et al. Determination of Structural Models of the Complex between the Cytoplasmic Domain of  
550 Erythrocyte Band 3 and Ankyrin-R Repeats 13-24. *Journal of Biological Chemistry* **286**, 20746-20757  
551 (2011).
- 552 12. Risinger, M.A., Dotimas, E.M. & Cohen, C.M. Human erythrocyte protein 4.2, a high copy number  
553 membrane protein, is N-myristylated. *J Biol Chem* **267**, 5680-5 (1992).
- 554 13. Toye, A.M. et al. Protein-4.2 association with band 3 (AE1, SLCA4) in *Xenopus* oocytes: effects of three  
555 natural protein-4.2 mutations associated with hemolytic anemia. *Blood* **105**, 4088-95 (2005).
- 556 14. Korsgren, C., Lawler, J., Lambert, S., Speicher, D. & Cohen, C.M. Complete amino acid sequence and  
557 homologies of human erythrocyte membrane protein band 4.2. *Proc Natl Acad Sci U S A* **87**, 613-7 (1990).
- 558 15. Zhang, D., Kiyatkin, A., Bolin, J.T. & Low, P.S. Crystallographic structure and functional interpretation of  
559 the cytoplasmic domain of erythrocyte membrane band 3. *Blood* **96**, 2925-33 (2000).
- 560 16. Arakawa, T. et al. Crystal structure of the anion exchanger domain of human erythrocyte band 3. *Science*  
561 **350**, 680-4 (2015).
- 562 17. Michaely, P., Tomchick, D.R., Machius, M. & Anderson, R.G. Crystal structure of a 12 ANK repeat stack  
563 from human ankyrinR. *EMBO J* **21**, 6387-96 (2002).
- 564 18. Stark, H. GraFix: stabilization of fragile macromolecular complexes for single particle cryo-EM. *Methods*  
565 *Enzymol* **481**, 109-26 (2010).
- 566 19. De Vecchis, D., Reithmeier, R.A.F. & Kalli, A.C. Molecular Simulations of Intact Anion Exchanger 1  
567 Reveal Specific Domain and Lipid Interactions. *Biophys J* **117**, 1364-1379 (2019).
- 568 20. Wang, D.N. Band 3 protein: structure, flexibility and function. *FEBS Lett* **346**, 26-31 (1994).
- 569 21. Jiang, J. et al. Single particle electron microscopy analysis of the bovine anion exchanger 1 reveals a  
570 flexible linker connecting the cytoplasmic and membrane domains. *PLoS One* **8**, e55408 (2013).
- 571 22. Romero, M.F., Chen, A.P., Parker, M.D. & Boron, W.F. The SLC4 family of bicarbonate (HCO<sub>3</sub><sup>-</sup>)  
572 transporters. *Mol Aspects Med* **34**, 159-82 (2013).
- 573 23. Wang, W. et al. Cryo-EM structure of the sodium-driven chloride/bicarbonate exchanger NDCBE. *Nat*  
574 *Commun* **12**, 5690 (2021).
- 575 24. Yu, X. et al. Dimeric structure of the uracil:proton symporter UraA provides mechanistic insights into the  
576 SLC4/23/26 transporters. *Cell Res* **27**, 1020-1033 (2017).
- 577 25. Wang, C. et al. Structural mechanism of the active bicarbonate transporter from cyanobacteria. *Nat Plants*  
578 **5**, 1184-1193 (2019).
- 579 26. Muller-Berger, S. et al. Roles of histidine 752 and glutamate 699 in the pH dependence of mouse band 3  
580 protein-mediated anion transport. *Biochemistry* **34**, 9325-32 (1995).
- 581 27. Chernova, M.N. et al. Electrogenic sulfate/chloride exchange in *Xenopus* oocytes mediated by murine AE1  
582 E699Q. *J Gen Physiol* **109**, 345-60 (1997).



- 583 28. Karbach, D., Staub, M., Wood, P.G. & Passow, H. Effect of site-directed mutagenesis of the arginine  
584 residues 509 and 748 on mouse band 3 protein-mediated anion transport. *Biochim Biophys Acta* **1371**, 114-  
585 22 (1998).
- 586 29. Bork, P., Holm, L. & Sander, C. The immunoglobulin fold. Structural classification, sequence patterns and  
587 common core. *J Mol Biol* **242**, 309-20 (1994).
- 588 30. Satchwell, T.J., Shoemark, D.K., Sessions, R.B. & Toye, A.M. Protein 4.2: a complex linker. *Blood Cells*  
589 *Mol Dis* **42**, 201-10 (2009).
- 590 31. Ahvazi, B., Kim, H.C., Kee, S.H., Nemes, Z. & Steinert, P.M. Three-dimensional structure of the human  
591 transglutaminase 3 enzyme: binding of calcium ions changes structure for activation. *EMBO J* **21**, 2055-67  
592 (2002).
- 593 32. Yee, V.C. et al. Three-dimensional structure of a transglutaminase: human blood coagulation factor XIII.  
594 *Proc Natl Acad Sci U S A* **91**, 7296-300 (1994).
- 595 33. Azim, A.C. et al. Human erythrocyte dematin and protein 4.2 (pallidin) are ATP binding proteins.  
596 *Biochemistry* **35**, 3001-6 (1996).
- 597 34. Risinger, M.A., Dotimas, E.M. & Cohen, C.M. Human Erythrocyte Protein 4.2, a High Copy Number  
598 Membrane-Protein, Is N-Myristylated. *Journal of Biological Chemistry* **267**, 5680-5685 (1992).
- 599 35. Malik, S., Sami, M. & Watts, A. A role for band 4.2 in human erythrocyte band 3 mediated anion transport.  
600 *Biochemistry* **32**, 10078-84 (1993).
- 601 36. Steck, T.L. & Yu, J. Selective solubilization of proteins from red blood cell membranes by protein  
602 perturbants. *J Supramol Struct* **1**, 220-32 (1973).
- 603 37. Korsgren, C. & Cohen, C.M. Purification and properties of human erythrocyte band 4.2. Association with  
604 the cytoplasmic domain of band 3. *J Biol Chem* **261**, 5536-43 (1986).
- 605 38. Rybicki, A.C. et al. Human erythrocyte protein 4.2 deficiency associated with hemolytic anemia and a  
606 homozygous 40glutamic acid-->lysine substitution in the cytoplasmic domain of band 3 (band  
607 3Montefiore). *Blood* **81**, 2155-65 (1993).
- 608 39. Inoue, T. et al. Homozygous missense mutation (band 3 Fukuoka: G130R): a mild form of hereditary  
609 spherocytosis with near-normal band 3 content and minimal changes of membrane ultrastructure despite  
610 moderate protein 4.2 deficiency. *Br J Haematol* **102**, 932-9 (1998).
- 611 40. Wang, C. et al. Structural basis of diverse membrane target recognitions by ankyrins. *Elife* **3**(2014).
- 612 41. Bhattacharyya, R. et al. Mapping of a palmitoylatable band 3-binding domain of human erythrocyte  
613 membrane protein 4.2. *Biochem J* **340** ( Pt 2), 505-12 (1999).
- 614 42. Grey, J.L., Kodippili, G.C., Simon, K. & Low, P.S. Identification of Contact Sites between Ankyrin and  
615 Band 3 in the Human Erythrocyte Membrane. *Biochemistry* **51**, 6838-6846 (2012).
- 616 43. Rybicki, A.C., Schwartz, R.S., Hustedt, E.J. & Cobb, C.E. Increased rotational mobility and extractability  
617 of band 3 from protein 4.2-deficient erythrocyte membranes: evidence of a role for protein 4.2 in  
618 strengthening the band 3-cytoskeleton linkage. *Blood* **88**, 2745-53 (1996).
- 619 44. van den Akker, E. et al. Investigating the key membrane protein changes during in vitro erythropoiesis of  
620 protein 4.2 (-) cells (mutations Chartres 1 and 2). *Haematologica* **95**, 1278-86 (2010).
- 621 45. Satchwell, T.J. et al. Severe Ankyrin-R deficiency results in impaired surface retention and lysosomal  
622 degradation of RhAG in human erythroblasts. *Haematologica* **101**, 1018-27 (2016).
- 623 46. Satchwell, T.J. et al. Critical band 3 multiprotein complex interactions establish early during human  
624 erythropoiesis. *Blood* **118**, 182-191 (2011).
- 625 47. Burton, N.M. & Bruce, L.J. Modelling the structure of the red cell membrane. *Biochem Cell Biol* **89**, 200-  
626 15 (2011).
- 627 48. Low, P.S. Structure and function of the cytoplasmic domain of band 3: center of erythrocyte membrane-  
628 peripheral protein interactions. *Biochim Biophys Acta* **864**, 145-67 (1986).
- 629 49. Van Dort, H.M., Moriyama, R. & Low, P.S. Effect of band 3 subunit equilibrium on the kinetics and  
630 affinity of ankyrin binding to erythrocyte membrane vesicles. *Journal of Biological Chemistry* **273**, 14819-  
631 14826 (1998).
- 632 50. Yi, S.J. et al. Red cell membranes of ankyrin-deficient nb/nb mice lack band 3 tetramers but contain normal  
633 membrane skeletons. *Biochemistry* **36**, 9596-604 (1997).
- 634 51. Ipsaro, J.J. & Mondragon, A. Structural basis for spectrin recognition by ankyrin. *Blood* **115**, 4093-101  
635 (2010).
- 636 52. Bruce, L.J. et al. A band 3-based macrocomplex of integral and peripheral proteins in the RBC membrane.  
637 *Blood* **101**, 4180-8 (2003).
- 638 53. Ho, C.M. et al. Malaria parasite translocon structure and mechanism of effector export. *Nature* **561**, 70-75  
639 (2018).

- 640 54. Liu, S. et al. Structure of the yeast spliceosomal postcatalytic P complex. *Science* **358**, 1278-1283 (2017).  
641 55. Yan, C., Wan, R., Bai, R., Huang, G. & Shi, Y. Structure of a yeast step II catalytically activated  
642 spliceosome. *Science* **355**, 149-155 (2017).  
643 56. Fitzpatrick, A.W.P. et al. Cryo-EM structures of tau filaments from Alzheimer's disease. *Nature* **547**, 185-  
644 190 (2017).  
645 57. Bennett, V. Isolation of an ankyrin-band 3 oligomer from human erythrocyte membranes. *Biochim Biophys*  
646 *Acta* **689**, 475-84 (1982).  
647 58. Liu, X., Li, M., Xia, X., Li, X. & Chen, Z. Mechanism of chromatin remodelling revealed by the Snf2-  
648 nucleosome structure. *Nature* **544**, 440-445 (2017).  
649 59. Mastronarde, D.N. Automated electron microscope tomography using robust prediction of specimen  
650 movements. *Journal of Structural Biology* **152**, 36-51 (2005).  
651 60. Zheng, S.Q. et al. MotionCor2: anisotropic correction of beam-induced motion for improved cryo-electron  
652 microscopy. *Nat Methods* **14**, 331-332 (2017).  
653 61. Punjani, A., Rubinstein, J.L., Fleet, D.J. & Brubaker, M.A. cryoSPARC: algorithms for rapid unsupervised  
654 cryo-EM structure determination. *Nat Methods* **14**, 290-296 (2017).  
655 62. Rohou, A. & Grigorieff, N. CTFFIND4: Fast and accurate defocus estimation from electron micrographs. *J*  
656 *Struct Biol* **192**, 216-21 (2015).  
657 63. Scheres, S.H. Processing of Structurally Heterogeneous Cryo-EM Data in RELION. *Methods Enzymol* **579**,  
658 125-57 (2016).  
659 64. Scheres, S.H. RELION: implementation of a Bayesian approach to cryo-EM structure determination. *J*  
660 *Struct Biol* **180**, 519-30 (2012).  
661 65. Bepler, T. et al. Positive-unlabeled convolutional neural networks for particle picking in cryo-electron  
662 micrographs. *Nat Methods* **16**, 1153-1160 (2019).  
663 66. Wang, N. et al. Structural basis of human monocarboxylate transporter 1 inhibition by anti-cancer drug  
664 candidates. *Cell* **184**, 370-383 e13 (2021).  
665 67. Rosenthal, P.B. & Henderson, R. Optimal determination of particle orientation, absolute hand, and contrast  
666 loss in single-particle electron cryomicroscopy. *J Mol Biol* **333**, 721-45 (2003).  
667 68. Kucukelbir, A., Sigworth, F.J. & Tagare, H.D. Quantifying the local resolution of cryo-EM density maps.  
668 *Nat Methods* **11**, 63-5 (2014).  
669 69. Pettersen, E.F. et al. UCSF Chimera--a visualization system for exploratory research and analysis. *J*  
670 *Comput Chem* **25**, 1605-12 (2004).  
671 70. Emsley, P. & Cowtan, K. Coot: model-building tools for molecular graphics. *Acta Crystallogr D Biol*  
672 *Crystallogr* **60**, 2126-32 (2004).  
673 71. Adams, P.D. et al. PHENIX: a comprehensive Python-based system for macromolecular structure solution.  
674 *Acta Crystallogr D Biol Crystallogr* **66**, 213-21 (2010).  
675 72. Madeira, F. et al. The EMBL-EBI search and sequence analysis tools APIs in 2019. *Nucleic Acids Res* **47**,  
676 W636-W641 (2019).  
677 73. Robert, X. & Gouet, P. Deciphering key features in protein structures with the new ENDscript server.  
678 *Nucleic Acids Res* **42**, W320-4 (2014).

679

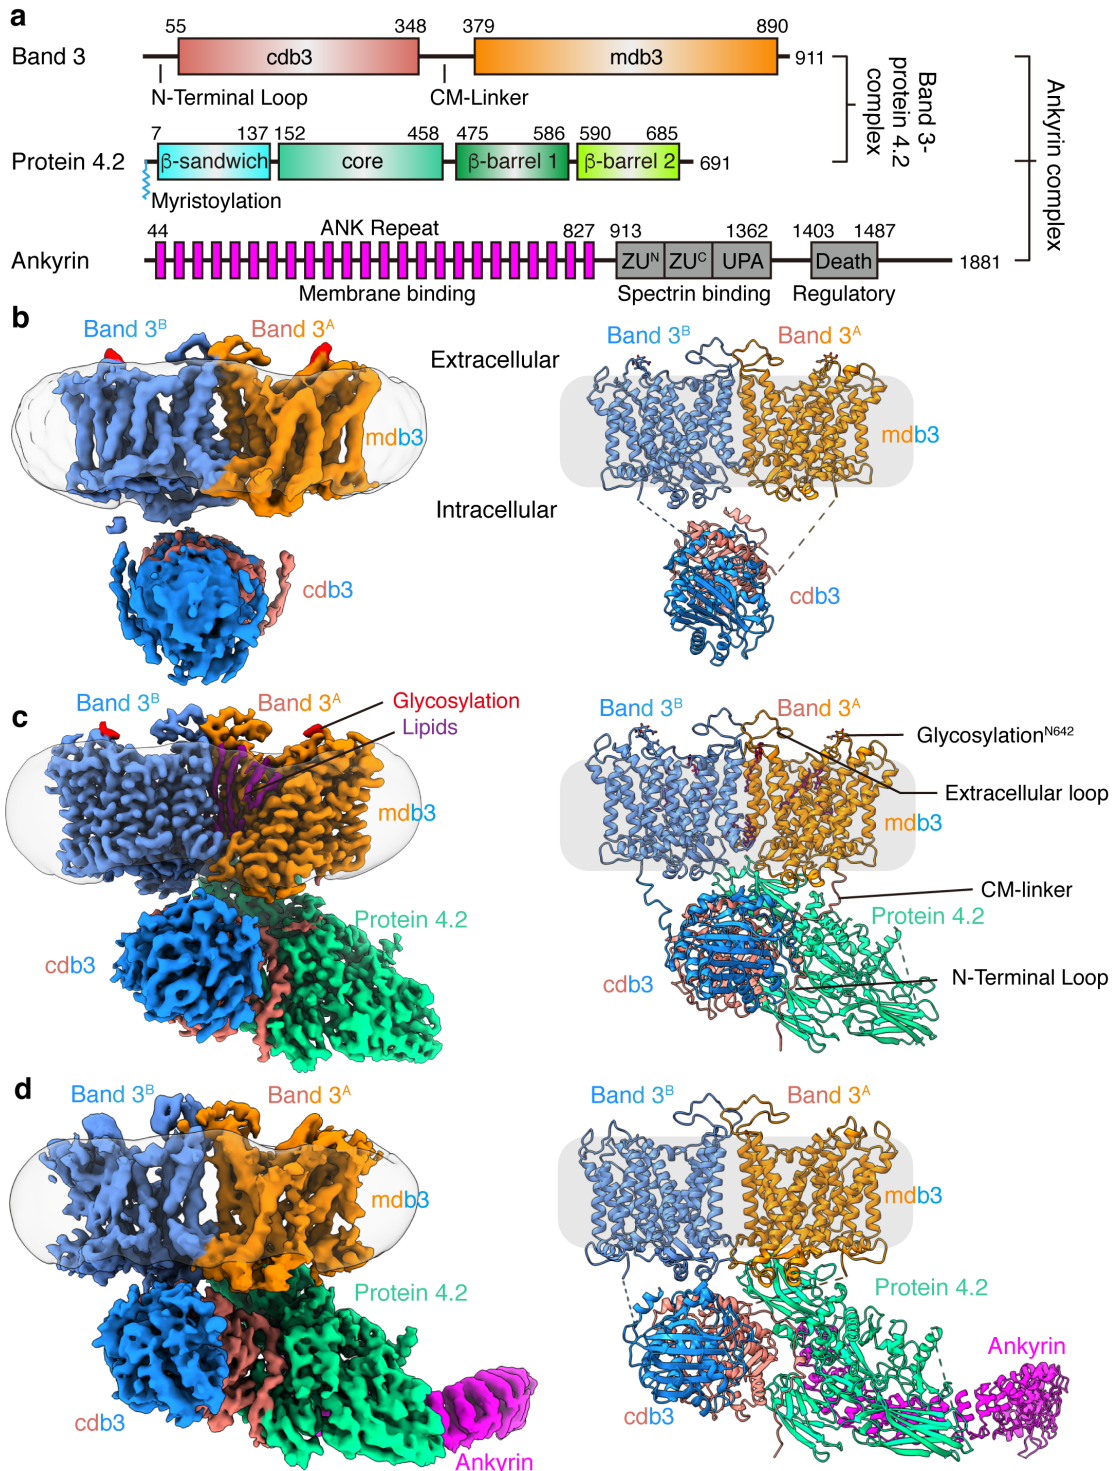

**Fig. 1: Cryo-EM structures of band 3, protein 4.2 complex and ankyrin-containing complex.** (a) Schematic illustrating domain organizations of band 3, protein 4.2 and ankyrin. Residue numbers at domain boundaries are indicated. CM-linker in band 3 represents the linker between cdb3 and mdb3. The myristoylation site of protein 4.2 at the N-terminal residue Gly2 is indicated. (b-d) Cryo-EM maps and atomic models of the band 3 dimer (b), B<sub>2</sub>P<sub>1</sub><sup>diagonal</sup> complex (c) and B<sub>2</sub>P<sub>1</sub>A<sub>1</sub> complex (d). The detergent belts are shown in transparent gray, depicting membrane boundaries. The maps in (c) and (d) are generated from focus refined maps combining membrane and cytoplasmic parts.

680  
681  
682  
683  
684  
685  
686  
687  
688

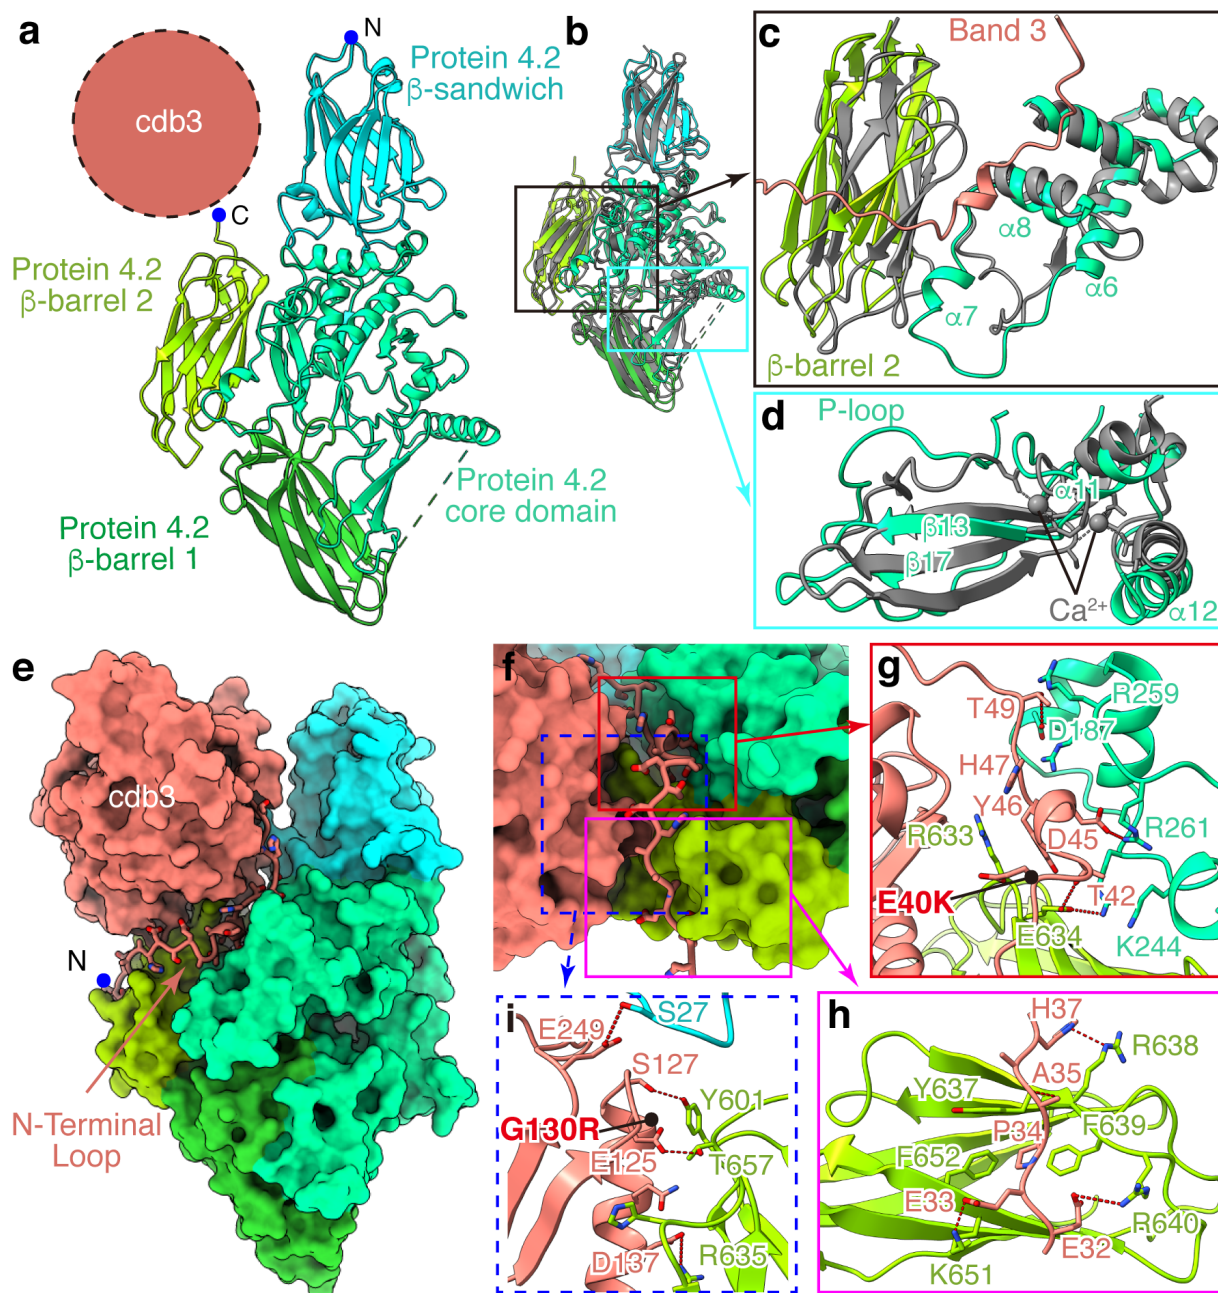

**Fig. 2: Protein 4.2 and its interactions with band 3.** (a) Structure of protein 4.2 shown in ribbon. The position of cdb3 is indicated by the dashed circle. (b) Superposition of protein 4.2 with transglutaminase (gray, PDB: 1L9N) to identify structural differences in protein 4.2. (c) Movements of  $\beta$ -barrel 2 and  $\alpha$ 7 of core domain in protein 4.2. (d) Shifts of the P-loop and  $\alpha$ 12 in protein 4.2. (e) Interactions of the N-terminal loop of band 3 with protein 4.2. Protein 4.2 and cdb3 are shown as surface, while N-terminal loop of band 3 in ribbon and side chains are shown as sticks. (f) Enlarged view of the N-terminal loop in (e). Three important regions are boxed: region 1 (red box) indicates the interactions around residues 40 to 50 of N-terminal loop; region 2 (magenta box) indicates the interactions around residues 30 to 40 of N-terminal loop; region 3 (dashed blue box) shows the interactions between cdb3 and protein 4.2. (g-i) Details of the interactions in boxed regions of (f). Residues involved in the interactions are shown as sticks. Red dashed lines indicate hydrogen bonds and electrostatic interactions. Disease mutations (E40K and G130R) on band 3 are indicated by black dots.

689  
690  
691  
692  
693  
694  
695  
696  
697  
698  
699  
700  
701  
702

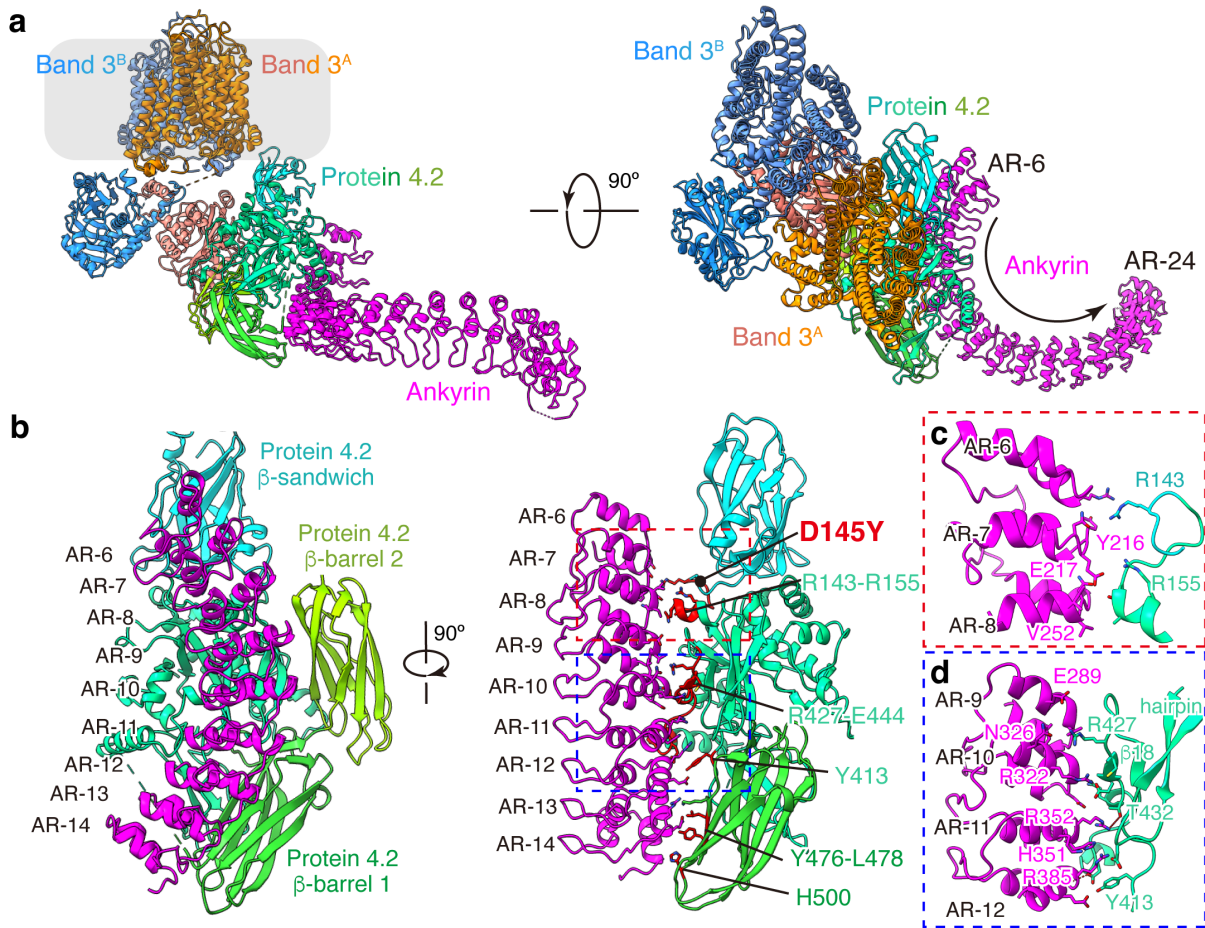

703

704

705

706

707

708

709

**Fig. 3: Anchorage of ankyrin to protein 4.2.** (a) Atomic model of the B<sub>2</sub>P<sub>1</sub>A<sub>1</sub> complex shown as ribbon. Approximate boundaries of the membrane are indicated in transparent gray. (b) Different views of the protein 4.2-ankyrin interface. Band 3 and ARs 15-24 of ankyrin are omitted for clarity. Residues of protein 4.2 involved in ankyrin interaction are colored in red and labeled. A disease mutation (D145Y) on protein 4.2 is indicated by a black dot. (c-d) Details of interactions in boxed regions of (b).

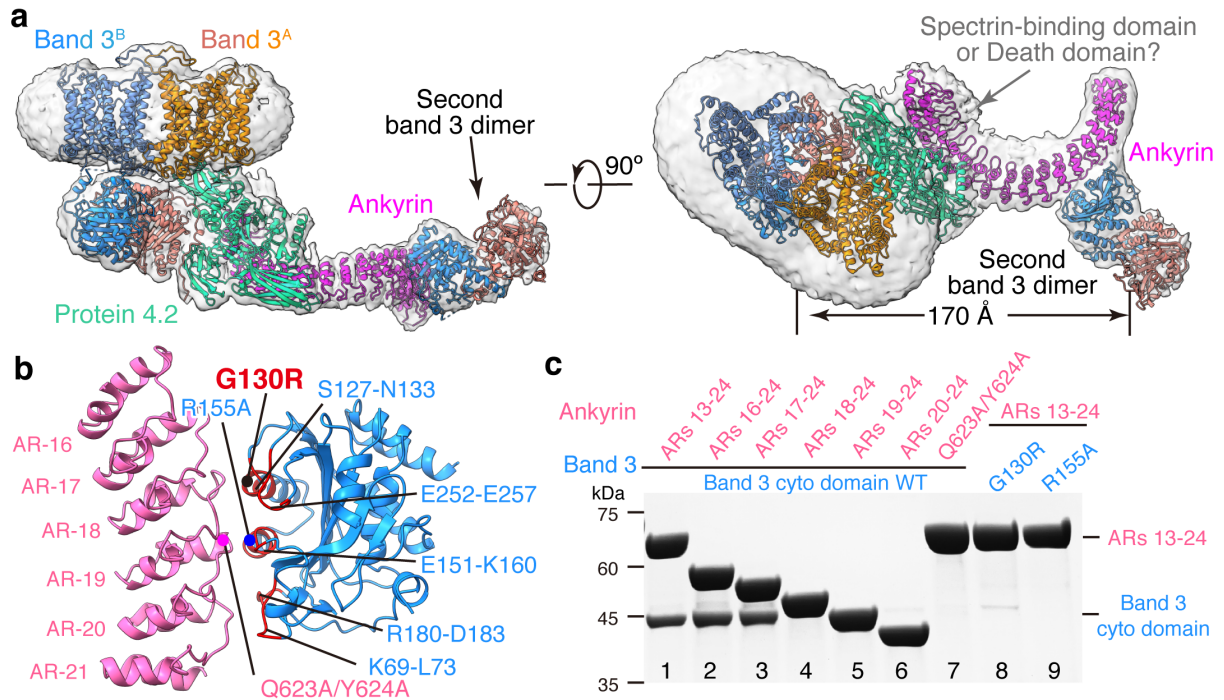

**Fig. 4: Interaction of ankyrin with band 3.** (a) Two orthogonal views of the atomic model of  $B_4P_1A_1$  complex (ribbon), with density map in transparent gray. The density of the membrane domains of the second band 3 dimer are weak and only visible at low density threshold, and are thus not modeled. (b) Interaction between cdb3 and ankyrin from  $B_2P_1A_2$  complex. Residues of band 3 involved in ankyrin interaction are colored in red and labeled. Positions of the mutations used in (c) are indicated as dots. (c) SDS-PAGE gel of the His-tag pull-down assay from the recombinant proteins. Band 3 mutations G130R and R155A eliminated ankyrin binding; ankyrin truncations (ARs 18-24, ARs 19-24 and ARs 20-24) and the mutations on AR-19 (Q623A/Y624A) abolished band 3 interaction. The experiments were repeated independently for three times and representative results are shown here.

710  
711  
712  
713  
714  
715  
716  
717  
718  
719  
720  
721

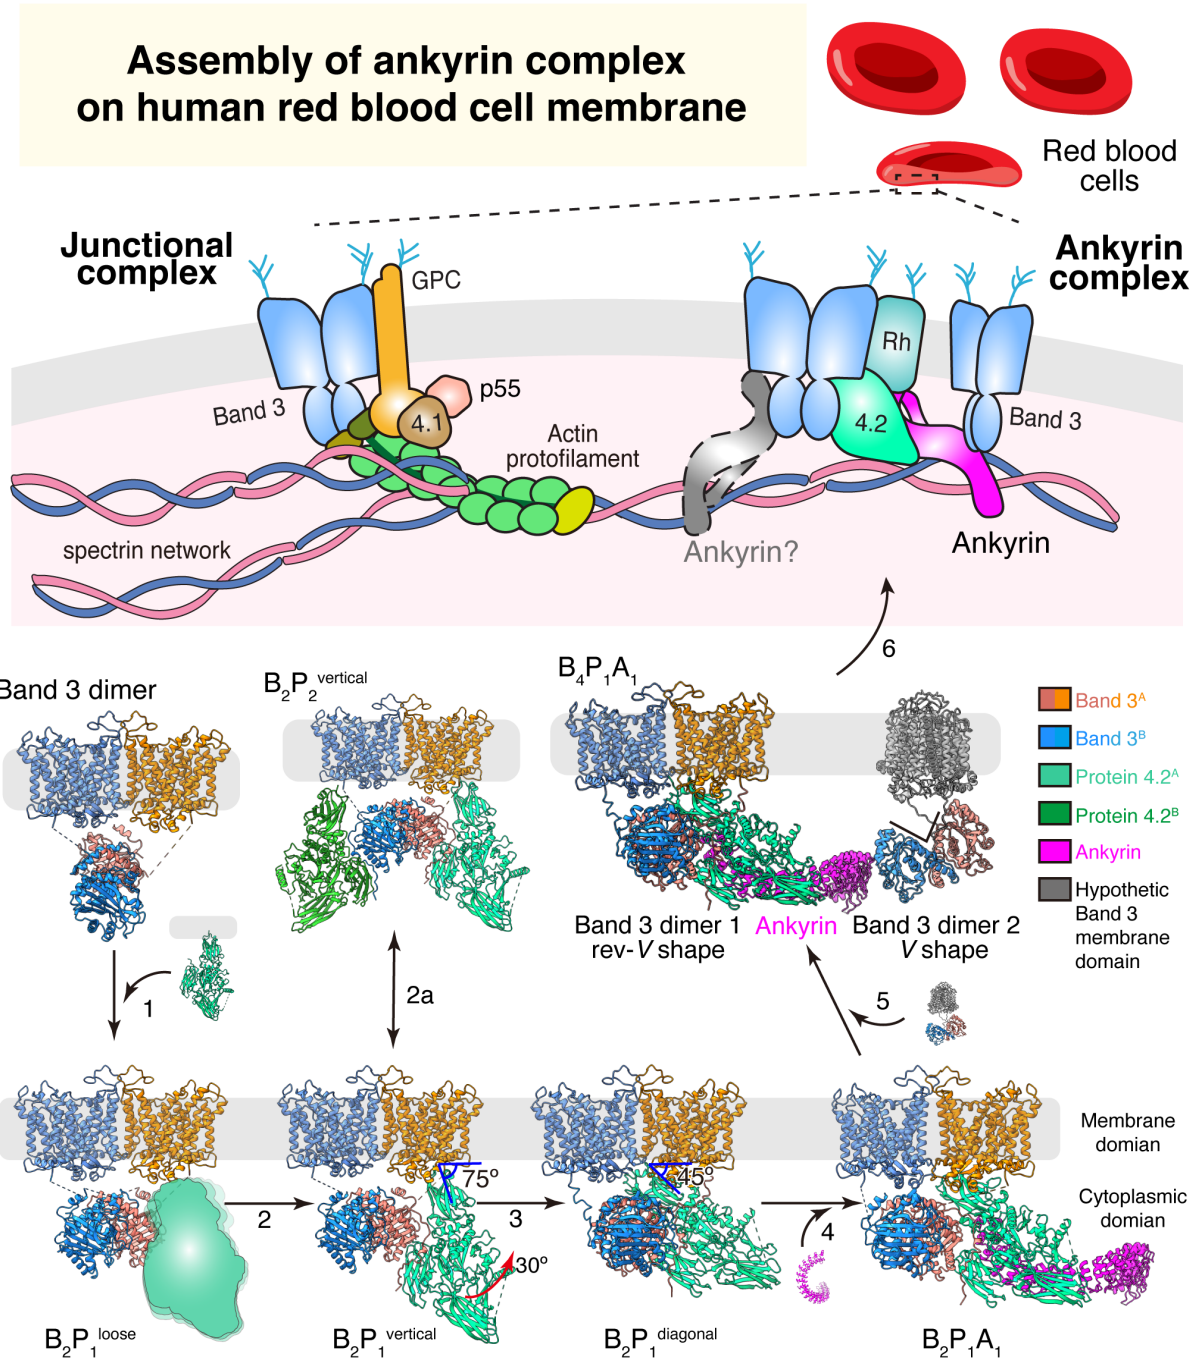

722

723

724

725

726

727

728

**Fig. 5: Schematic and possible assembly model of the ankyrin complex.** Seven of the nine structures reported in the paper are depicted, each showing one possible assembly state (loosely-bound protein 4.2 and complexes involving the second ankyrin molecule are shown as cartoon). For the  $B_4P_1A_1$  complex, the membrane domains of the second band 3 dimer are hypothetically modelled (gray) to align to the membrane. Arrows depict possible directions of the assembly pathway, from the band 3 dimer to the ankyrin complex.

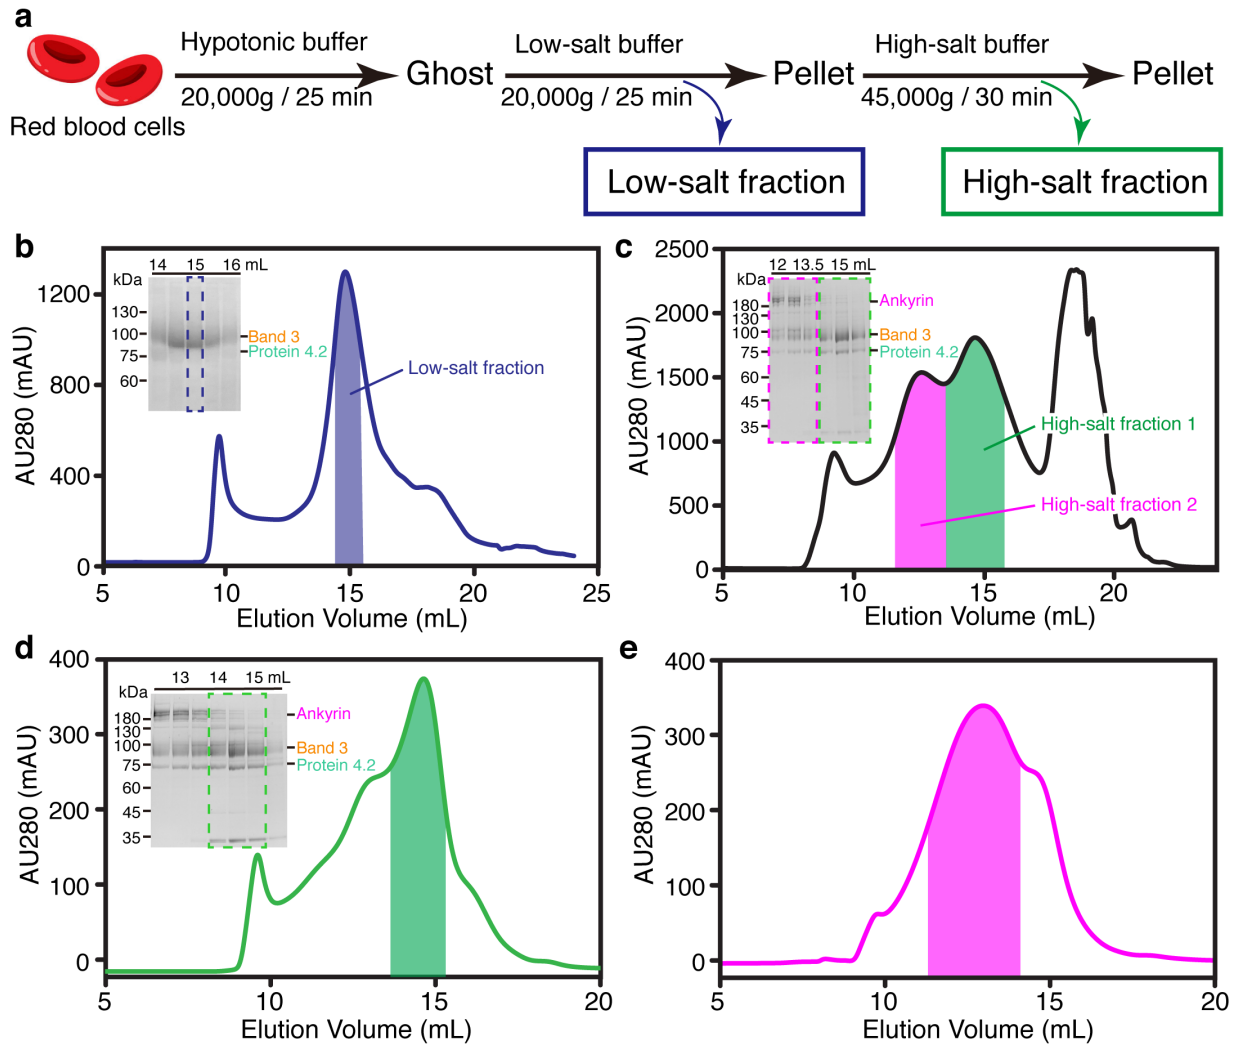

729

730

731

732

733

734

735

736

737

738

739

740

741

742

**Extended Data Fig. 1: Purification and cryo-EM reconstruction of the erythrocyte membrane proteins.** (a) Workflow of the stepwise fractionation of erythrocyte membrane proteins. (b) The second gel-filtration chromatography profile of the low-salt fraction. The result from SDS-PAGE analysis of the peak fractions is inserted in the upper left corner. The peak fractions were applied to SDS-PAGE and visualized by Coomassie blue staining. Dashed blue box on the gel and blue bar on the chromatogram indicate the fractions collected for cryo-EM. (c) The first gel-filtration chromatography profile of the high-salt fraction. Green and magenta boxes on the gel and green and magenta bars on the chromatogram indicate the fractions collected for the protein 4.2 complex and ankyrin complex, respectively. (d) The second gel-filtration chromatography profile and corresponding gel of the protein 4.2 complex. Dashed green box on the gel and green bar on the chromatogram indicate the fractions collected for cryo-EM. (e) The gel-filtration chromatography profile of the ankyrin complex after Grafix purification. Magenta bar on the chromatogram indicates the fractions collected for cryo-EM.



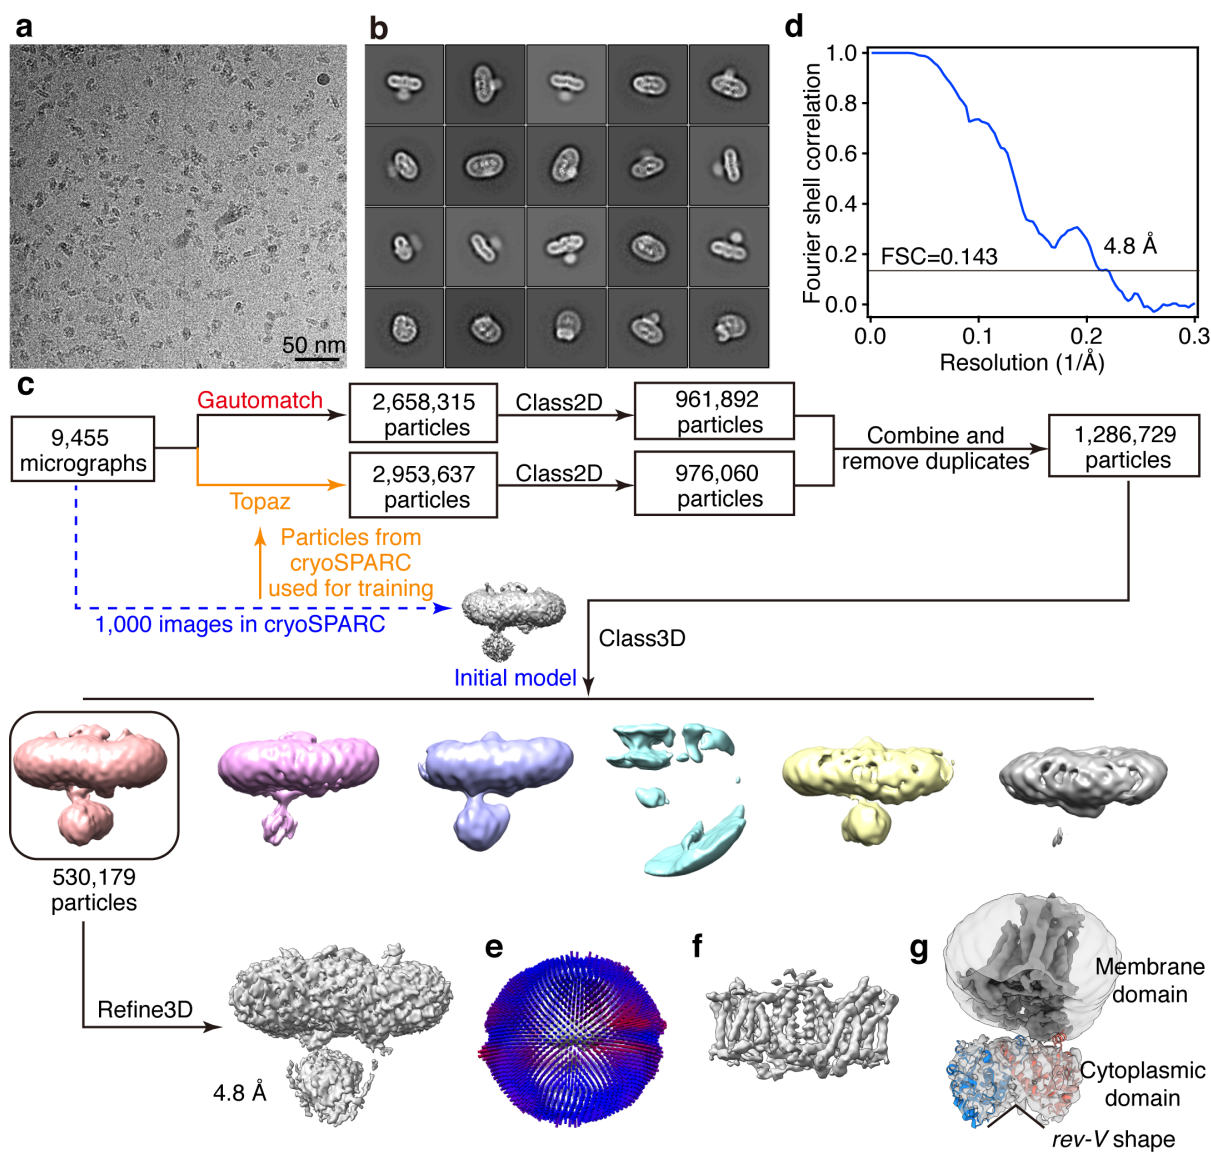

743

744

745

746

747

748

749

750

**Extended Data Fig. 2: Cryo-EM analysis of the low-salt fraction (band 3). (a)**

Representative cryo-EM image of the low-salt fraction. **(b)** Selected 2D class averages of the cryo-EM particle images. **(c)** Flow chart of cryo-EM data processing. **(d)** Gold-standard Fourier shell correlation (FSC) curve for 3D reconstruction. **(e)** Angular distribution of cryo-EM reconstructions used for final refinement. **(f)** Density of the membrane domain. **(g)** Atomic model of band 3 cytoplasmic domain fitted into the cryo-EM density. A lower map threshold is used in **(g)** compared to that of **(f)** to better present the cytoplasmic domain.

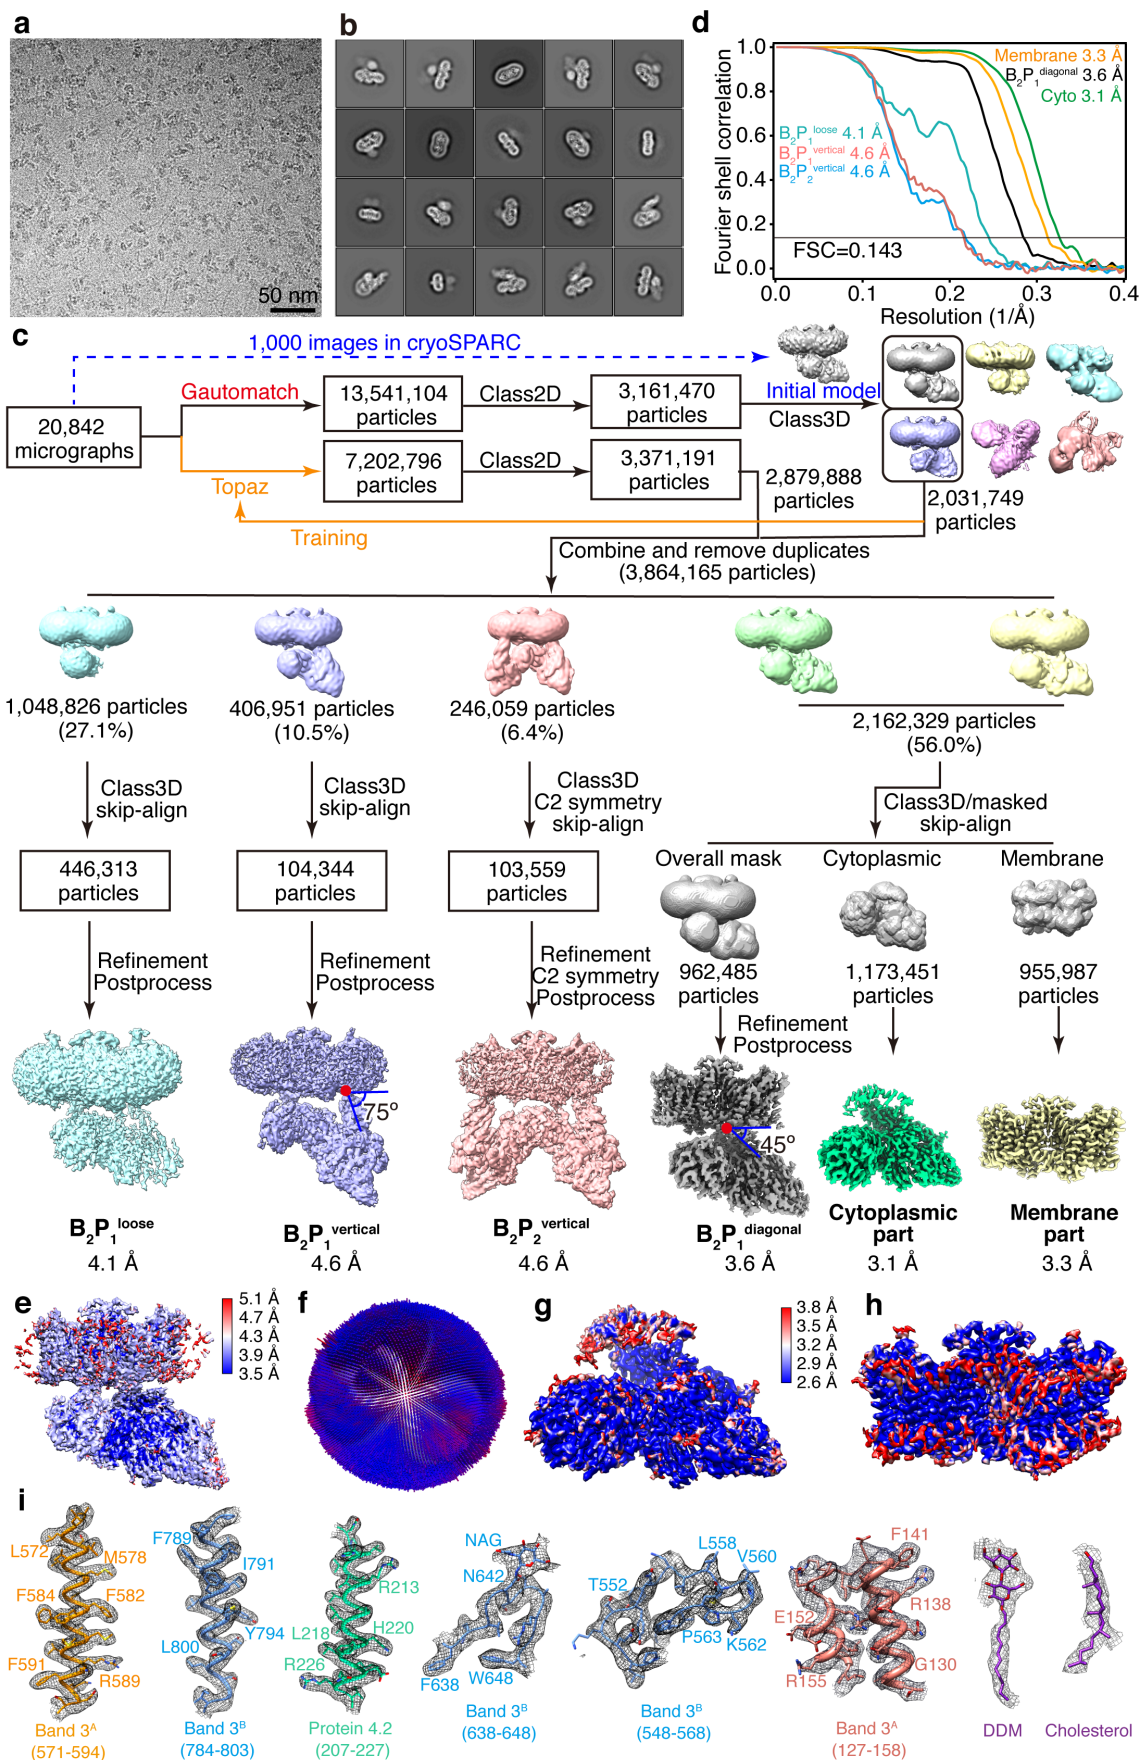

752 **Extended Data Fig. 3: Image processing for the cryo-EM data of the high-salt fraction 1**  
753 **(band 3-protein 4.2 complex).** (a) Representative cryo-EM image of the high-salt fraction 1. (b)  
754 Selected 2D class averages of the cryo-EM particle images. (c) Flow chart of cryo-EM data  
755 processing. (d), Gold-standard Fourier shell correlation (FSC) curves for 3D reconstructions. (e)  
756 Local resolution of the overall map of B2P1diagonal complex. (f) Angular distribution of cryo-EM  
757 reconstruction of B2P1diagonal complex used for final refinement. (g-h) Local resolutions of the  
758 focus refinement maps of the cytoplasmic part and membrane part of B2P1diagonal complex. (i)  
759 Representative cryo-EM density maps of the B2P1diagonal complex.  
760

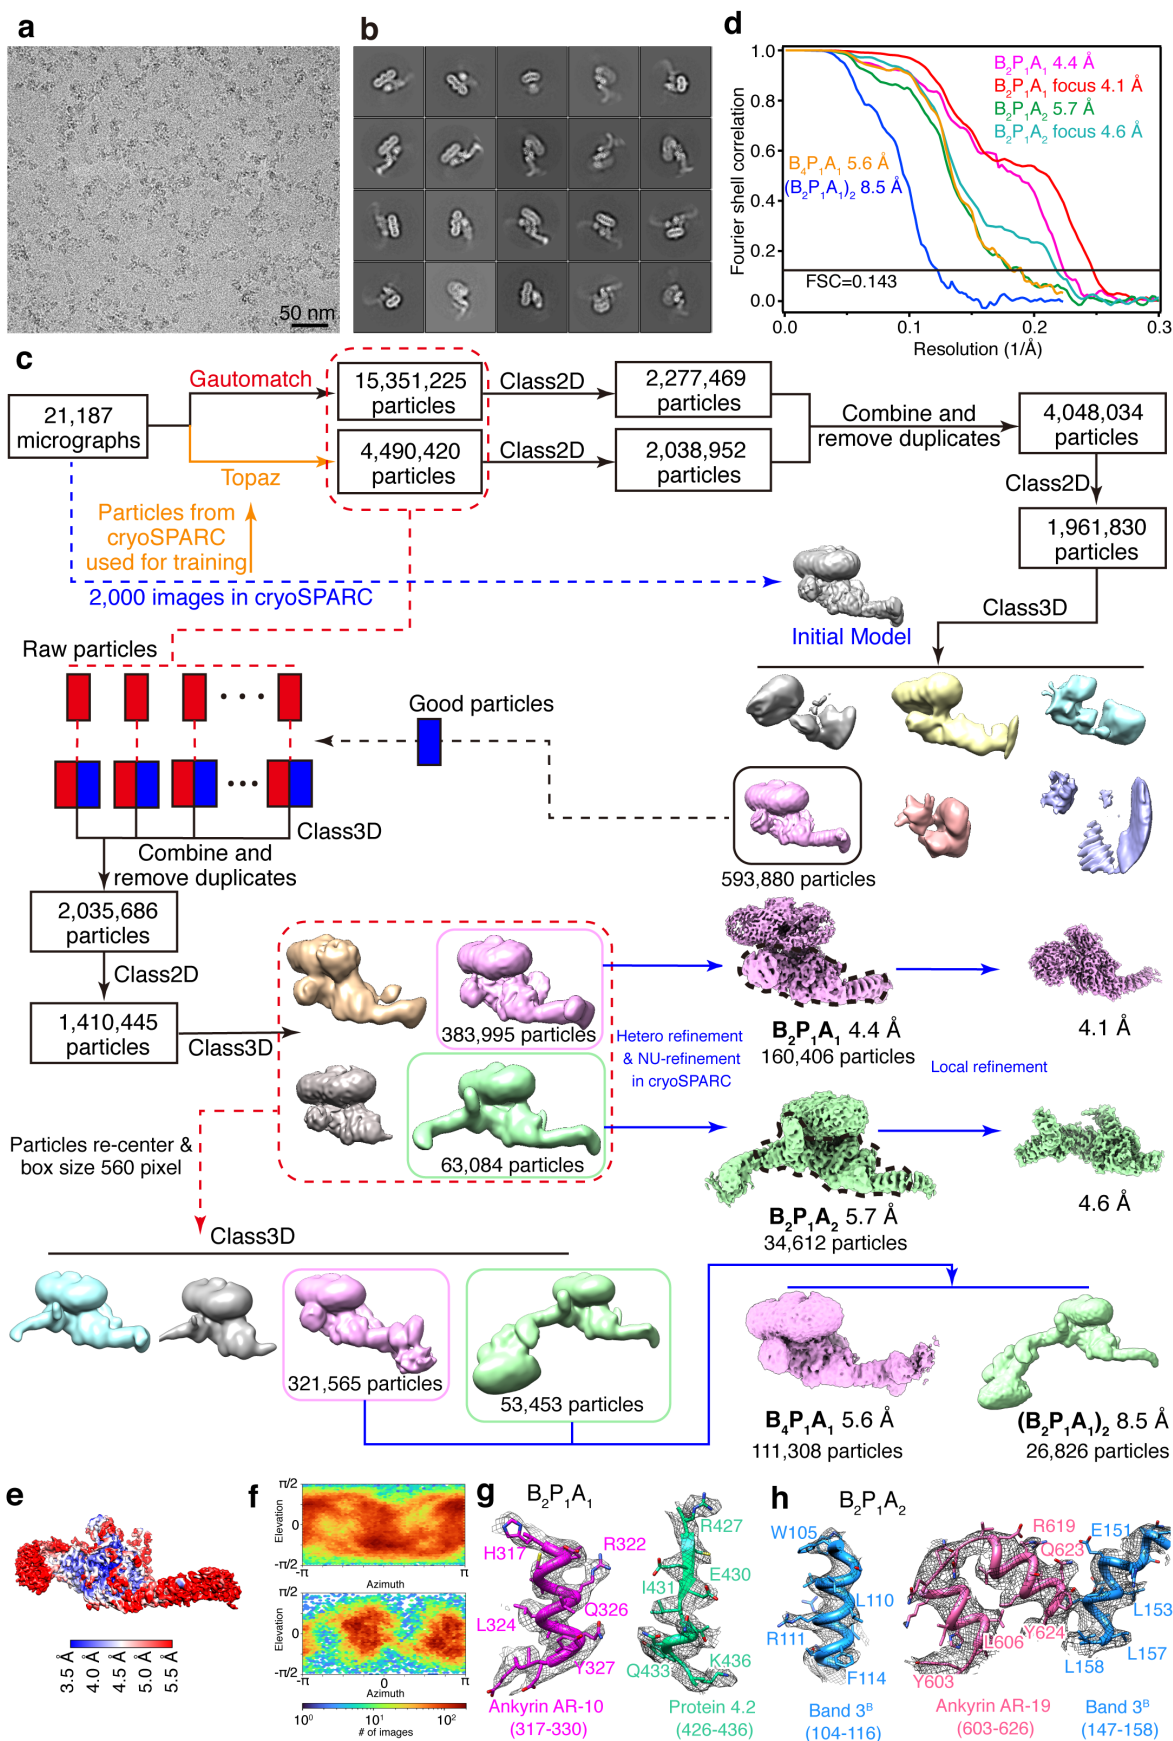

762 **Extended Data Fig. 4: Cryo-EM analysis of the high-salt fraction 2 (ankyrin complex).** (a)  
763 Representative cryo-EM image of the high-salt fraction 2. (b) Selected 2D class averages of  
764 cryo-EM particle images. (c) Flow chart of cryo-EM data processing. (d) Gold-standard Fourier  
765 shell correlation (FSC) curves for 3D reconstructions. (e) Local resolution of the overall map of  
766 B<sub>2</sub>P<sub>1</sub>A<sub>1</sub> complex. (f) Angular distribution of cryo-EM reconstruction of B<sub>2</sub>P<sub>1</sub>A<sub>1</sub> complex. (g)  
767 Representative cryo-EM density maps of the B<sub>2</sub>P<sub>1</sub>A<sub>1</sub> complex showing the fragments of ankyrin  
768 and protein 4.2 at their binding interface. (h) Representative cryo-EM density maps of the  
769 B<sub>2</sub>P<sub>1</sub>A<sub>2</sub> complex showing the fragments of ankyrin and band 3 at their binding interface.

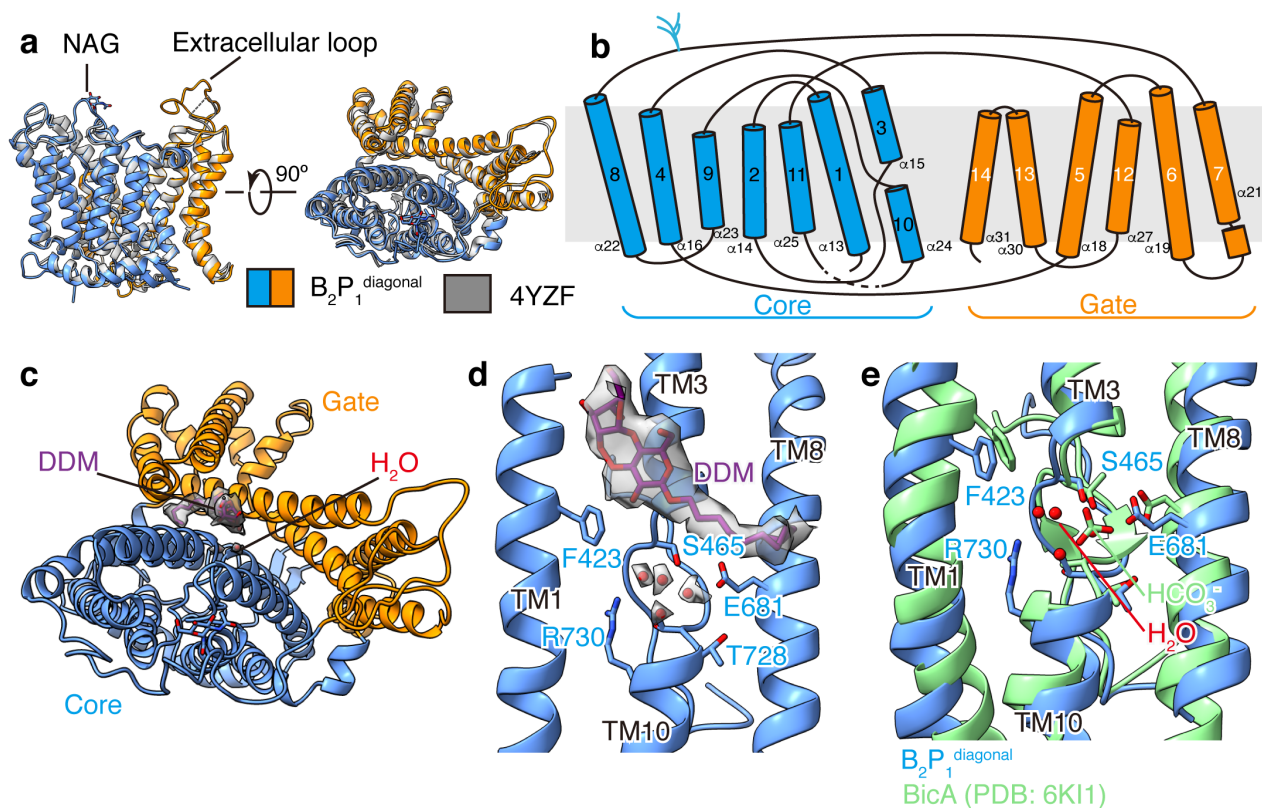

770  
771  
772 **Extended Data Fig. 5: Structural analysis of the band 3 membrane domain.** (a)  
773 Superposition of the band 3 membrane domain in B<sub>2</sub>P<sub>1</sub><sup>diagonal</sup> complex and reported crystal  
774 structure (PDB: 4YZF)<sup>16</sup>. (b) Topology of the transmembrane helices of band 3. (c) Density of  
775 the DDM molecule at the interface of the core and gate domain. (d) Enlarged view of the  
776 substrate binding site in B<sub>2</sub>P<sub>1</sub><sup>diagonal</sup> complex. Four water molecules were tentatively modelled  
777 into the cryo-EM density of band 3 near the substrate binding site. (e) Comparison of the  
substrate binding site in band 3 with that in bicarbonate transporter BicA (PDB: 6K11)<sup>25</sup>.



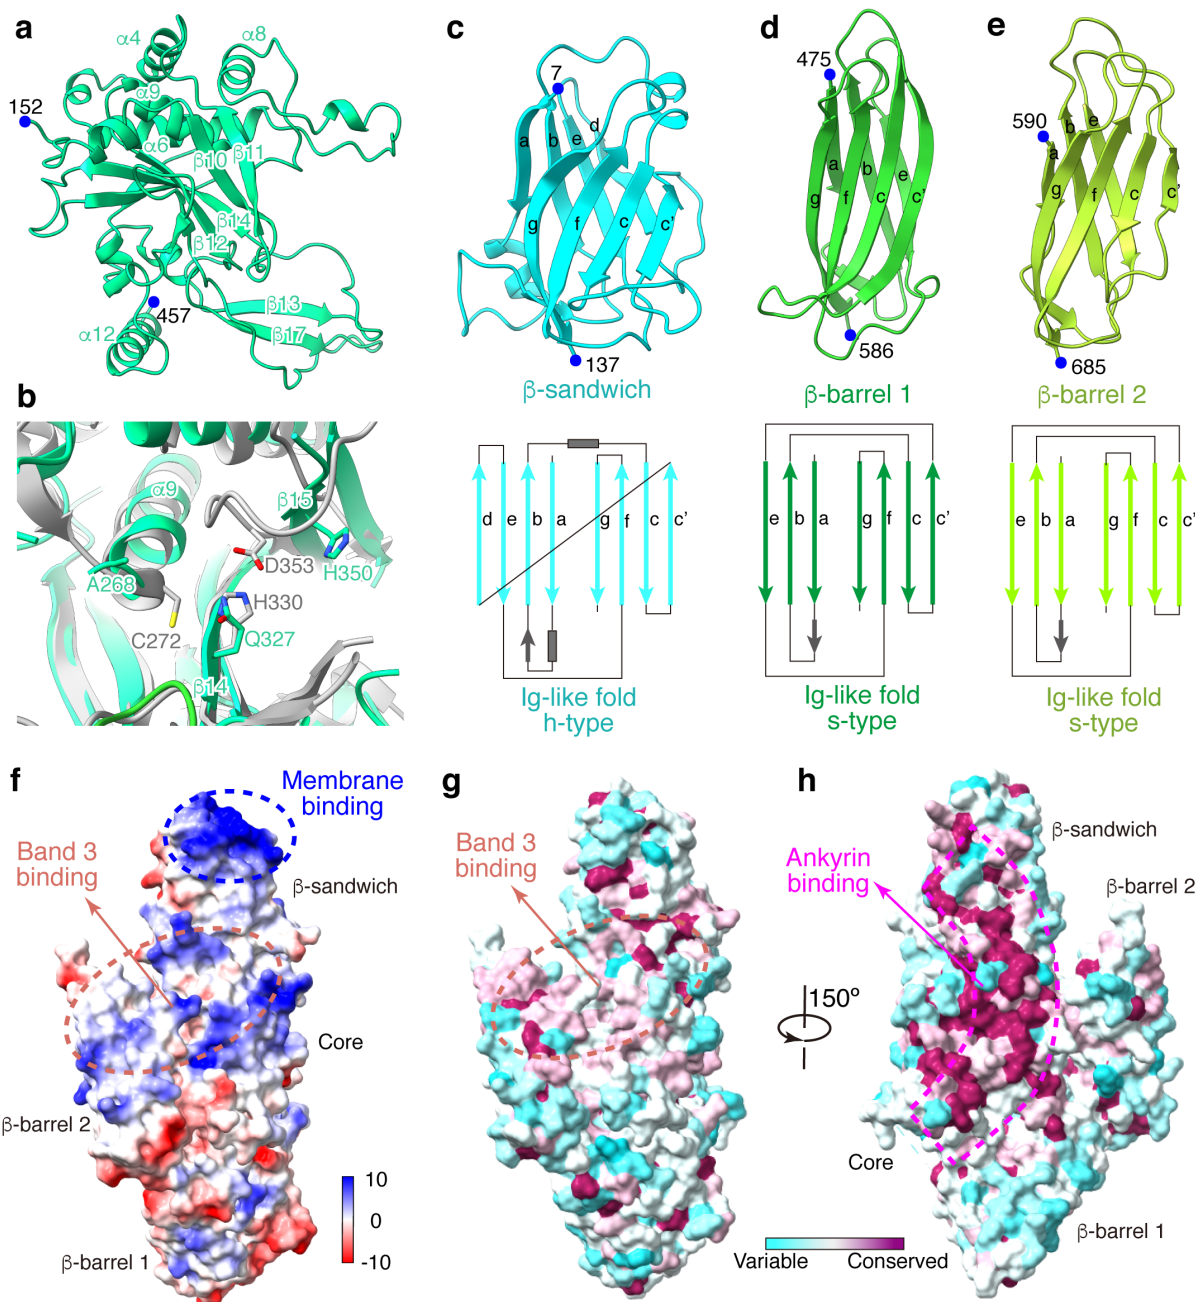

786

787

788

789

790

791

792

793

794

795

**Extended Data Fig. 7: Structure of protein 4.2.** (a) Structure of the core domain shown in ribbon. Residue numbers of its N and C terminus are labeled. (b) Superposition of protein 4.2 with transglutaminase (gray, PDB: 1L9N)<sup>31</sup>, showing the missing catalytic triad in protein 4.2. (c-e) Structures of the three Ig-like domains and illustrations of their secondary structure. (f) The electrostatic surface of protein 4.2, showing its membrane binding site (blue dashed circle) and band 3 binding interface (orange dashed circle). (g-h) Sequence conservation of protein 4.2 among mammals mapped to the structure. Orientation in (g) is the same as that in (f). Orange dashed circle shows the band 3 binding interface; magenta dashed box shows the ankyrin binding interface.



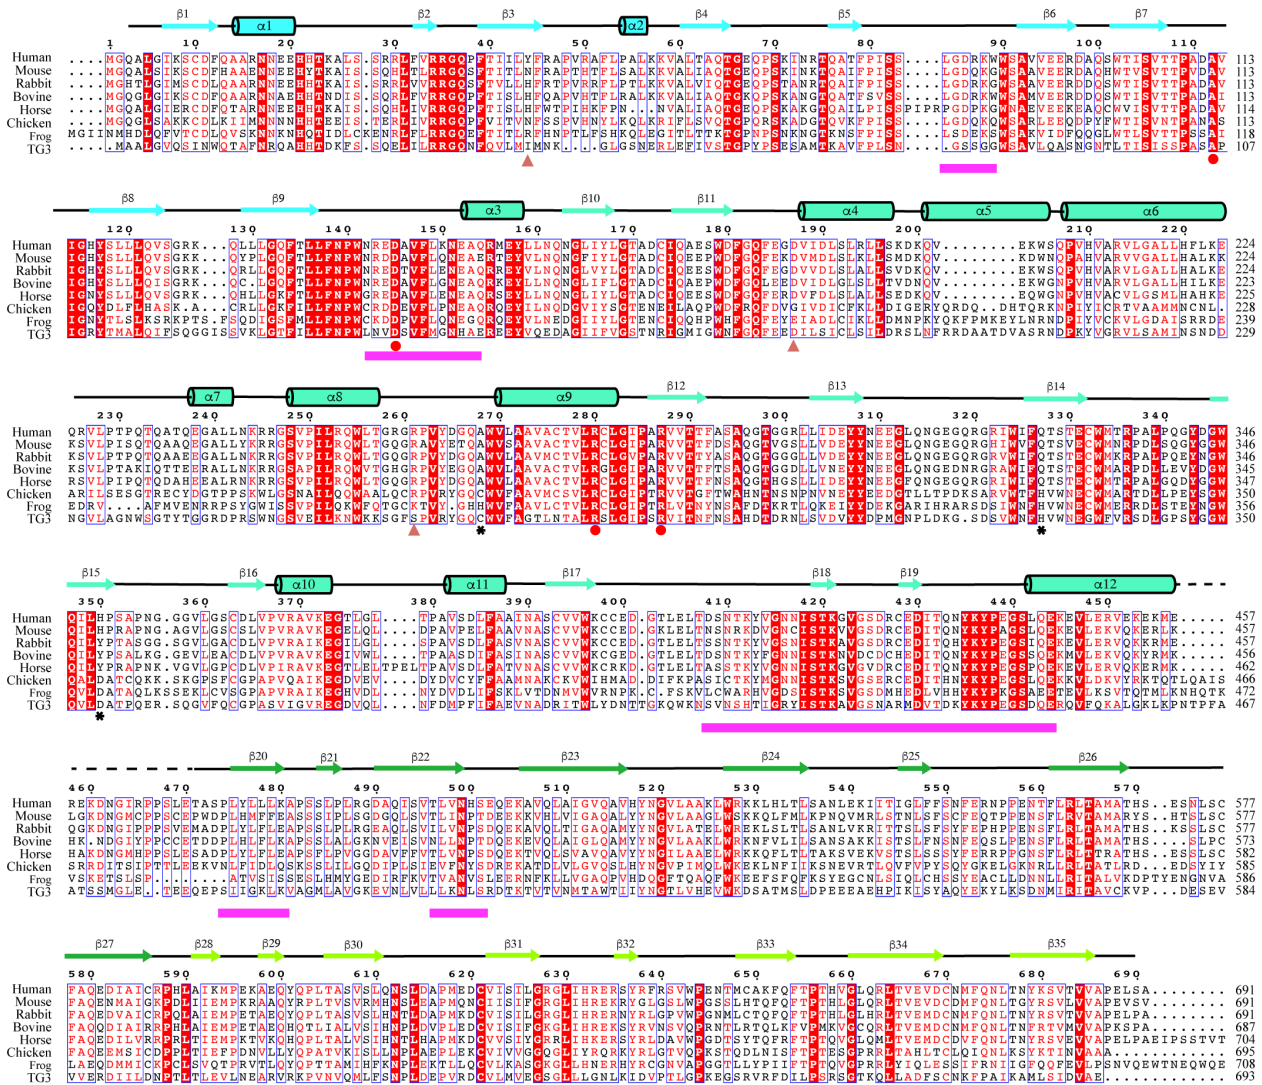

796

797

798

799

800

801

802

803

804

805

### Extended Data Fig. 8: Sequence alignment of protein 4.2 from different species.

Sequences of human protein 4.2 (P16452), mouse protein 4.2 (P49222), rabbit protein (G1TDR3), bovine protein 4.2 (O46510), horse protein 4.2 (F6ZDW1), chicken protein 4.2 (E1BQZ4), frog protein 4.2 (XP\_018090678.1) and human transglutaminase 3 (Q08188). The sequence alignment is done using the Clustal Omega server<sup>72</sup>; the figure is generated in ESPript 3<sup>73</sup>. Salmon triangles represent protein 4.2 residues interacting with band 3; magenta bars indicate the regions of protein 4.2 interacting with ankyrin; reported disease mutations on human protein 4.2 are labeled as red circles; black stars indicate the catalytic residues of human transglutaminase 3.

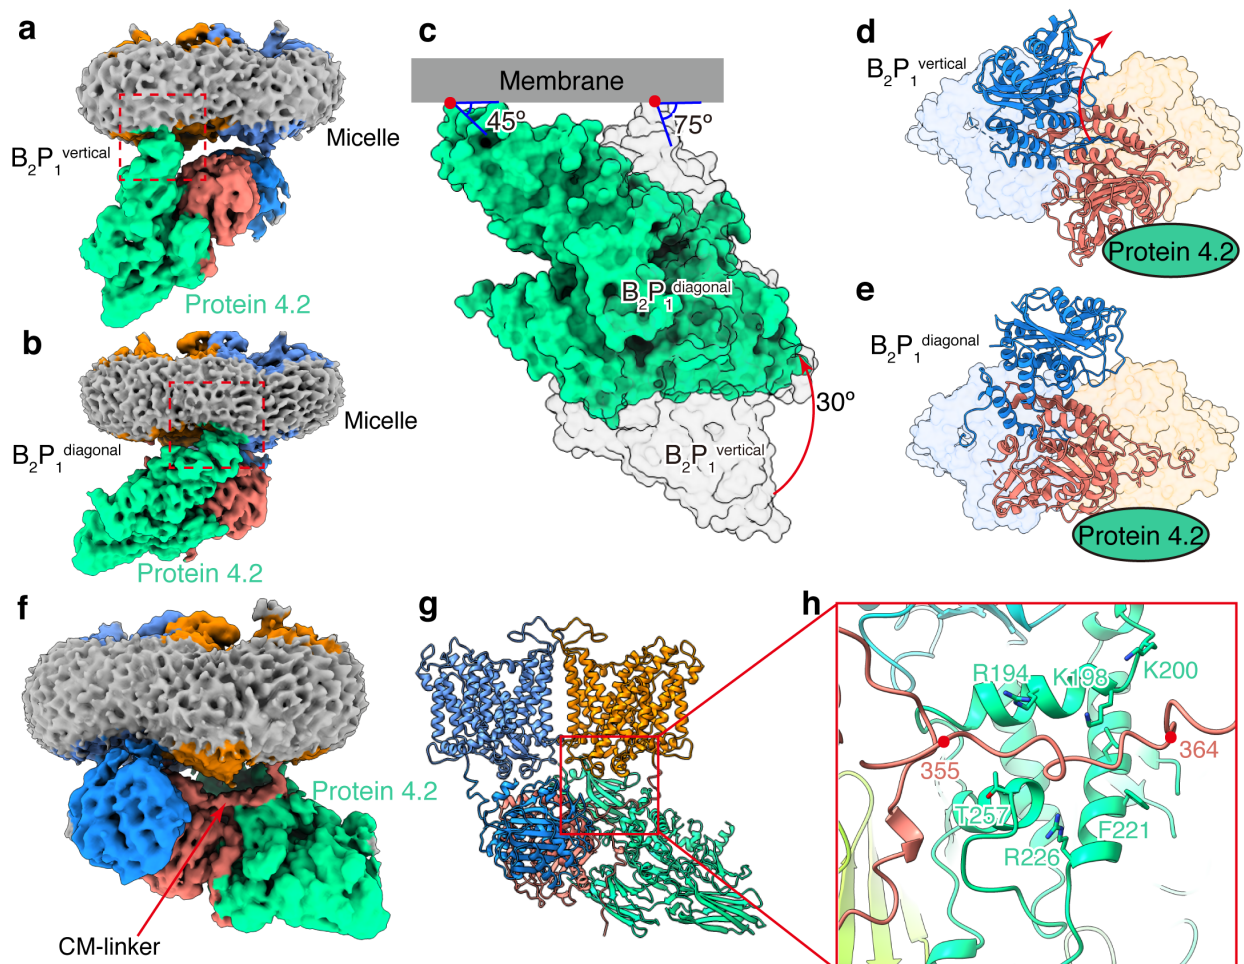

806

807

808

809

810

811

812

813

814

815

816

817

818

819

**Extended Data Fig. 9: Conformational changes of band 3 and protein 4.2 during the assembly process.** (a-b) Density map of the  $B_2P_1^{\text{vertical}}$  complex and  $B_2P_1^{\text{diagonal}}$  complex. Red box indicates the anchorage site of protein 4.2 N-termini to the membrane. (c) Rotation of protein 4.2 (red arrow) from vertical (transparent grey surface) to diagonal conformation (green surface). The two complexes are superposed according to the membrane domains of band 3. The cytoplasmic domains of band 3 are omitted for clarity. Angles between the membrane (grey bar) and protein 4.2 are labeled. (d-e) Rotation of the cytoplasmic domain of band 3 (red arrow) from  $B_2P_1^{\text{vertical}}$  to  $B_2P_1^{\text{diagonal}}$  complex viewed from the cytoplasmic side. The membrane domain of band 3 is shown as transparent surface and cytoplasmic domain as ribbon. Protein 4.2 is indicated as a green oval for clarity. (f) Density map of the  $B_2P_1^{\text{diagonal}}$  complex sharpened with B-factor of  $-50 \text{ \AA}^2$  showing the interaction of the CM-linker with protein 4.2. (g-h) Ribbon representation of the CM-linker region. Residues of protein 4.2 interacting with the CM-linker are labeled.

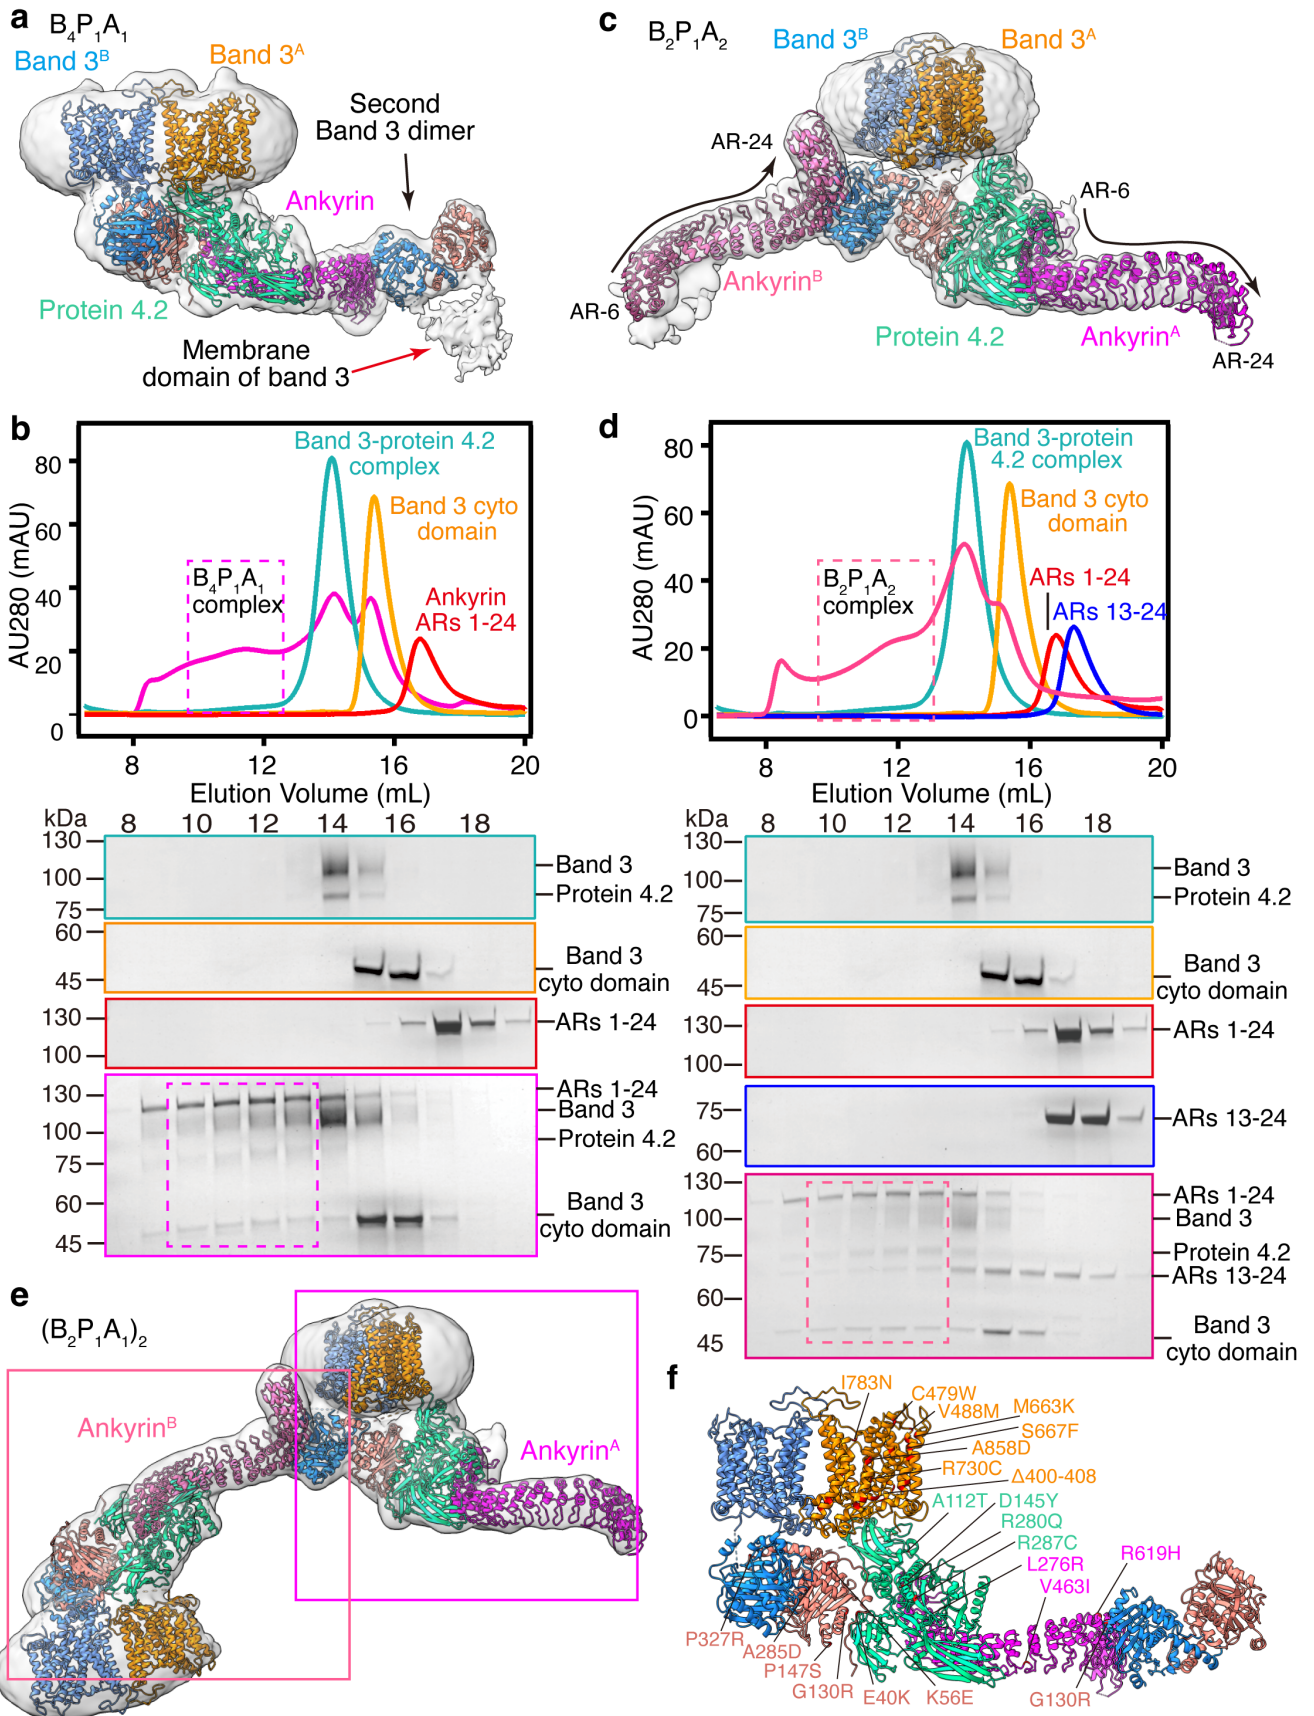

821 **Extended Data Fig. 10: Analysis of the ankyrin-containing complexes.** (a) Atomic model of  
822  $B_4P_1A_1$  complex in ribbon superposed with the density map at a low threshold. Red arrow  
823 indicates the density of the membrane domain of the second band 3 dimer. (b) Analytical gel  
824 filtration assay showing the assembly of  $B_4P_1A_1$  complex in vitro. Dashed boxes show the  
825 position of  $B_4P_1A_1$  complex. Experiments were repeated for two times with similar results. (c)  
826 Atomic model of  $B_2P_1A_2$  complex in ribbon superposed with the density map at a low threshold.  
827 The density for the second band 3 dimer is indicated by arrow. (d) Analytical gel filtration assay  
828 showing the assembly of  $B_2P_1A_2$  complex in vitro. Dashed boxes show the position of  $B_2P_1A_2$   
829 complex. The gel-filtration and SDS-PAGE results of protein 4.2 complex, band 3 cytoplasmic  
830 domain and ARs 1-24 are the same as that in (b). Second band 3 dimer may be incorporated  
831 into this complex, resulting in the  $B_4P_1A_2$ . Experiments were repeated for two times with similar  
832 results. (e) Atomic model of  $(B_2P_1A_1)_2$  complex in ribbon superposed with the density map.  
833 Boxes show the position of individual  $B_2P_1A_1$  complexes. (f) Reported disease mutations  
834 mapped on the structure of  $B_4P_1A_1$  complex.  
835

836

**Table 1. Cryo-EM data collection, refinement and validation statistics.**

|                                                     | <b>Band 3</b> | <b>B<sub>2</sub>P<sub>1</sub><sup>I</sup></b> | <b>B<sub>2</sub>P<sub>1</sub><sup>V</sup></b> | <b>B<sub>2</sub>P<sub>2</sub></b> | <b>B<sub>2</sub>P<sub>1</sub><sup>d</sup></b> | <b>B<sub>2</sub>P<sub>1</sub>A<sub>1</sub></b> | <b>B<sub>2</sub>P<sub>1</sub>A<sub>2</sub></b> | <b>B<sub>4</sub>P<sub>1</sub>A<sub>1</sub></b> | <b>(B<sub>2</sub>P<sub>1</sub>A<sub>1</sub>)<sub>2</sub></b> |
|-----------------------------------------------------|---------------|-----------------------------------------------|-----------------------------------------------|-----------------------------------|-----------------------------------------------|------------------------------------------------|------------------------------------------------|------------------------------------------------|--------------------------------------------------------------|
| <b>EMDB</b>                                         | EMD-26148     | EMD-26145                                     | EMD-26146                                     | EMD-26147                         | EMD-26142                                     | EMD-26149                                      | EMD-26151                                      | EMD-26153                                      | EMD-26154                                                    |
| <b>(Focused refinement)</b>                         |               |                                               |                                               |                                   | (EMD-26143/<br>EMD-26144)                     | (EMD-26150)                                    | (EMD-26152)                                    |                                                |                                                              |
| <b>PDB</b>                                          | 7TW2          |                                               | 7TW0                                          | 7TW1                              | 7TVZ                                          | 7TW3                                           | 7TW5                                           | 7TW6                                           |                                                              |
| <b>Data collection and processing</b>               |               |                                               |                                               |                                   |                                               |                                                |                                                |                                                |                                                              |
| Magnification                                       | 105K          |                                               |                                               | 81K                               |                                               |                                                | 81K                                            |                                                |                                                              |
| Camera                                              | K2            |                                               |                                               | K3                                |                                               |                                                | K3                                             |                                                |                                                              |
| Voltage (kV)                                        | 300           |                                               |                                               | 300                               |                                               |                                                | 300                                            |                                                |                                                              |
| Electron exposure (e <sup>-</sup> /Å <sup>2</sup> ) | 50            |                                               |                                               | 50                                |                                               |                                                | 50                                             |                                                |                                                              |
| Defocus range (μm)                                  | -1.8 to -2.6  |                                               |                                               | -1.8 to -2.6                      |                                               |                                                | -1.8 to -2.6                                   |                                                |                                                              |
| Pixel size (Å)                                      | 1.062         |                                               |                                               | 1.1                               |                                               | 1.1                                            | 1.1                                            | 2.2                                            | 2.2                                                          |
| Symmetry imposed                                    | C1            | C1                                            | C1                                            | C2                                | C1                                            | C1                                             | C1                                             | C1                                             | C1                                                           |
| Particle number                                     | 530K          | 446K                                          | 104K                                          | 104K                              | 962K                                          | 384K                                           | 63K                                            | 322K                                           | 53K                                                          |
| Map resolution                                      | 4.8           | 4.1                                           | 4.6                                           | 4.6                               | 3.6                                           | 4.4                                            | 5.7                                            | 5.6                                            | 8.5                                                          |
|                                                     |               |                                               |                                               |                                   | (3.3/3.1)                                     | (4.1)                                          | (4.4)                                          |                                                |                                                              |
| FSC threshold                                       | 0.143         | 0.143                                         | 0.143                                         | 0.143                             | 0.143                                         | 0.143                                          | 0.143                                          | 0.143                                          | 0.143                                                        |
| <b>Refinement</b>                                   |               |                                               |                                               |                                   |                                               |                                                |                                                |                                                |                                                              |
| Map sharpening B-factor (Å <sup>2</sup> )           | -237          |                                               | -192                                          | -212                              | -190                                          | -214                                           | -324                                           |                                                |                                                              |
| Model resolution (Å)                                | 4.1           |                                               | 3.9                                           | 3.8                               | 3.5                                           | 4.4                                            | 5.6                                            | 5.5                                            |                                                              |
| FSC threshold                                       | 0.143         |                                               | 0.143                                         | 0.143                             | 0.143                                         | 0.143                                          | 0.143                                          | 0.143                                          |                                                              |
| <b>Model composition</b>                            |               |                                               |                                               |                                   |                                               |                                                |                                                |                                                |                                                              |
| Non-hydrogen atoms                                  | 12,838        |                                               | 18,266                                        | 23,625                            | 18,659                                        | 22,641                                         | 27,048                                         | 27,184                                         |                                                              |
| Protein residues                                    | 1,619         |                                               | 2,309                                         | 2,993                             | 2,340                                         | 2,944                                          | 3,579                                          | 3,515                                          |                                                              |
| Ligand                                              | 2             |                                               | 2                                             |                                   | 9                                             |                                                |                                                |                                                |                                                              |
| <b>B factors (Å<sup>2</sup>)</b>                    |               |                                               |                                               |                                   |                                               |                                                |                                                |                                                |                                                              |
| Protein                                             | 457.5         |                                               | 196.0                                         | 191.9                             | 68.9                                          | 276.3                                          | 258.2                                          | 592.2                                          |                                                              |
| Ligand                                              | 306.2         |                                               | 196.9                                         |                                   | 74.0                                          |                                                |                                                |                                                |                                                              |
| <b>R.m.s. deviations</b>                            |               |                                               |                                               |                                   |                                               |                                                |                                                |                                                |                                                              |
| Bond lengths (Å)                                    | 0.003         |                                               | 0.003                                         | 0.003                             | 0.002                                         | 0.004                                          | 0.003                                          | 0.004                                          |                                                              |
| Bond angles (°)                                     | 0.754         |                                               | 0.729                                         | 0.744                             | 0.500                                         | 0.748                                          | 0.769                                          | 0.759                                          |                                                              |
| <b>Validation</b>                                   |               |                                               |                                               |                                   |                                               |                                                |                                                |                                                |                                                              |
| MolProbity score                                    | 1.56          |                                               | 1.33                                          | 1.47                              | 1.34                                          | 1.68                                           | 1.84                                           | 1.68                                           |                                                              |
| Clashscore                                          | 9.46          |                                               | 5.6                                           | 7.46                              | 4.08                                          | 9.8                                            | 12.0                                           | 10.2                                           |                                                              |
| Poor rotamers (%)                                   | 0.07          |                                               | 0                                             | 0                                 | 0                                             | 0.08                                           | 0                                              | 0.03                                           |                                                              |
| <b>Ramachandran plot</b>                            |               |                                               |                                               |                                   |                                               |                                                |                                                |                                                |                                                              |
| Favored (%)                                         | 97.8          |                                               | 97.9                                          | 97.7                              | 97.2                                          | 97.0                                           | 96.7                                           | 97.2                                           |                                                              |
| Allowed (%)                                         | 2.2           |                                               | 2.1                                           | 2.3                               | 2.8                                           | 3.0                                            | 3.3                                            | 2.8                                            |                                                              |
| Disallowed (%)                                      | 0             |                                               | 0                                             | 0                                 | 0                                             | 0                                              | 0                                              | 0                                              |                                                              |

838

**Movie S1. Sequential assembly of the ankyrin complex.**

## Assembly of ankyrin complex

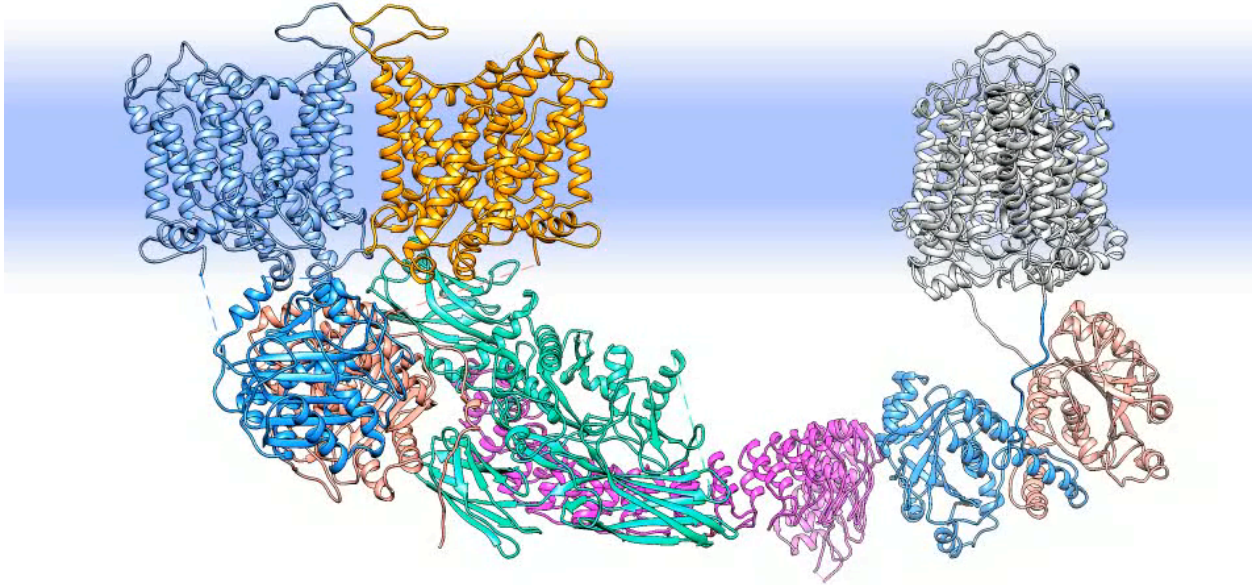

839
